# Supplementary material
Source: PubMed Central journal article supplement (PMC9539503)
Supplement: OBR-23-e13366-s001.pdf [file OBR-23-e13366-s001.pdf]

# **The Nutrition Transition to a stage of high obesity and noncommunicable disease prevalence is not inevitable**

**Authors:** Barry M. Popkin,<sup>1</sup> Shu Wen Ng<sup>1</sup>

<sup>1</sup> Department of Nutrition, Gillings School of Global Public Health and the Carolina Population Center, University of North Carolina Chapel Hill, North Carolina, United States of America

Barry M. Popkin, [popkin@unc.edu](mailto:popkin@unc.edu)

Shu Wen Ng, [shuwen@unc.edu](mailto:shuwen@unc.edu)

123 W. Franklin Street, CB #8120

Chapel Hill, NC 27516-3997

**Supplemental Table S1.** Country burdens by age, sex, and region in 1990s UNICEF and NCD\_RisC surveys with DHS for preschoolers where gaps existed

**Supplemental Table S2.** Country burdens by age, sex, and region in 2010s UNICEF and NCD\_RisC surveys with DHS for preschoolers where gaps existed

**Supplemental Table S3.** Number of households with children and women, mean age for women, and GDP per capita (PPP) by country for earliest and latest survey years

**Supplemental Table S4.** Prevalence of wasting, stunting, and overweight or obesity for children (ages 0–4 years) and annualized change in prevalence from earliest to latest survey years

**Supplemental Table S5.** Prevalence of thinness and overweight for women (ages 15–49 years) and annualized change in prevalence from earliest to latest survey years

**Supplemental Table S6.** Prevalence of overweight and obesity for lowest and highest wealth quintiles, differences in the earliest and latest years, and annualized changes in disparity

Supplemental Table S1. Country burdens by age, sex, and region in 1990s UNICEF and NCD\_RisC surveys with DHS for preschoolers where gaps existed

| World Bank Region                              | Country                     | Population           | GDP per capita* | Kids (0-4)   |              |             | Girls (5-18) |             | Boys (5-18)  |             | Women (19+)  |              | Men (19+)    |              | DBM based on Anthrometry** |                 |                 |
|------------------------------------------------|-----------------------------|----------------------|-----------------|--------------|--------------|-------------|--------------|-------------|--------------|-------------|--------------|--------------|--------------|--------------|----------------------------|-----------------|-----------------|
|                                                |                             |                      |                 | Wasting      | Stunting     | Overweight  | Wasting      | Overweight  | Wasting      | Overweight  | Thin         | Overweight   | Thin         | Overweight   | >40% overweight            | >30% overweight | >20% overweight |
| <b>Global Total: All Countries</b>             |                             | <b>4,423,919,065</b> |                 | <b>11.20</b> | <b>43.28</b> | <b>6.74</b> | <b>10.03</b> | <b>6.75</b> | <b>15.95</b> | <b>6.20</b> | <b>15.84</b> | <b>24.71</b> | <b>15.32</b> | <b>19.95</b> | <b>14</b>                  | <b>22</b>       | <b>45</b>       |
| <b>East Asia &amp; Pacific</b>                 | Australia                   | 18,072,000           | 20,890          | 0.0          | 0.0          | 7.9         | 0.5          | 27.6        | 1.0          | 27.6        | 2.4          | 48.6         | 0.6          | 61.2         |                            |                 |                 |
|                                                | Cambodia                    | 10,653,558           | 801             | 13.4         | 58.6         | 6.5         | 7.8          | 2.3         | 15.8         | 2.3         | 20.6         | 13.8         | 18.7         | 9.5          |                            |                 |                 |
|                                                | China                       | 1,204,855,000        | 1,869           | 2.9          | 36.7         | 9.3         | 5.3          | 5.0         | 6.8          | 6.6         | 9.7          | 19.4         | 8.1          | 17.8         |                            |                 |                 |
|                                                | Dem. People's Rep. of Korea | 21,862,299           | 12,332          | 20.8         | 63.9         |             | 5.7          | 8.0         | 6.8          | 11.9        | 9.9          | 25.0         | 8.1          | 22.8         |                            |                 | HI              |
|                                                | Fiji                        | 775,498              | 4,584           | 9.8          | 4.3          | 2.2         | 3.6          | 26.3        | 5.4          | 14.3        | 3.3          | 56.3         | 3.3          | 45.7         |                            |                 |                 |
|                                                | Indonesia                   | 196,957,849          | 4,384           | 12.7         | 51.9         | 4.4         | 8.5          | 4.0         | 14.2         | 3.1         | 19.9         | 17.3         | 20.9         | 10.5         |                            |                 |                 |
|                                                | Lao People's Dem. Rep.      | 4,851,923            | 1,475           | 11.8         | 53.6         |             | 6.4          | 2.6         | 14.9         | 2.3         | 18.6         | 14.6         | 18.4         | 9.4          |                            |                 |                 |
|                                                | Malaysia                    | 20,495,597           | 10,646          | 15.3         | 20.7         | 5.5         | 8.0          | 8.1         | 12.6         | 8.8         | 12.5         | 26.9         | 12.9         | 20.7         |                            |                 |                 |
|                                                | Mongolia                    | 2,298,039            | 3,094           | 2.4          | 33.1         |             | 2.3          | 12.4        | 3.2          | 8.1         | 4.1          | 43.5         | 3.7          | 40.0         | HI                         | HI              | HI              |
|                                                | Myanmar                     | 43,237,792           | 676             | 12.7         | 53.6         |             | 9.7          | 2.9         | 17.3         | 2.6         | 21.1         | 16.1         | 21.4         | 10.3         |                            |                 |                 |
|                                                | Philippines                 | 69,835,715           | 2,887           | 6.9          | 43.3         |             | 5.7          | 4.8         | 13.5         | 5.1         | 18.4         | 20.3         | 16.1         | 15.7         |                            |                 | HI              |
|                                                | Thailand                    | 59,491,790           | 6,840           | 7.3          | 21.1         |             | 7.5          | 5.6         | 12.1         | 5.8         | 14.0         | 20.5         | 15.7         | 13.3         |                            |                 |                 |
|                                                | Vanuatu                     | 168,235              | 1,903           | 6.8          | 25.7         |             | 1.3          | 20.9        | 2.5          | 9.3         | 4.5          | 47.8         | 2.3          | 38.7         |                            |                 |                 |
| Vietnam                                        | 71,995,500                  | 1,425                | 8.7             | 67.6         | 4.0          | 12.8        | 1.5          | 19.0        | 1.2          | 26.5        | 10.9         | 25.1         | 6.6          |              |                            |                 |                 |
| <b>Region Total: East Asia &amp; Pacific</b>   |                             | <b>1,725,550,795</b> |                 | <b>5.3</b>   | <b>39.8</b>  | <b>7.3</b>  | <b>6.2</b>   | <b>5.0</b>  | <b>9.0</b>   | <b>6.1</b>  | <b>12.4</b>  | <b>19.3</b>  | <b>11.3</b>  | <b>16.6</b>  | <b>1</b>                   | <b>1</b>        | <b>3</b>        |
| <b>Europe &amp; Central Asia</b>               | Albania                     | 3,187,784            | 2,782           | 8.1          | 20.4         | 9.5         | 2.6          | 7.7         | 2.5          | 10.2        | 3.3          | 40.5         | 0.9          | 48.6         |                            |                 |                 |
|                                                | Armenia                     | 3,217,342            | 1,585           | 3.3          | 15.1         | 10.8        | 1.8          | 15.6        | 2.8          | 11.8        | 4.2          | 47.0         | 3.0          | 44.7         |                            |                 |                 |
|                                                | Azerbaijan                  | 7,685,000            | 2,420           | 3.8          | 28.0         | 6.1         | 2.7          | 12.4        | 4.1          | 9.5         | 4.2          | 43.9         | 2.6          | 41.6         |                            |                 |                 |
|                                                | Czechia                     | 10,327,253           | 13,752          | 2.8          | 3.1          | 6.7         | 2.5          | 13.8        | 2.5          | 19.1        | 1.7          | 52.9         | 0.4          | 61.3         |                            |                 |                 |
|                                                | Georgia                     | 4,734,000            | 1,673           | 3.1          | 16.1         | 17.9        | 3.0          | 12.6        | 3.6          | 10.4        | 4.8          | 43.7         | 2.7          | 42.9         |                            |                 |                 |
|                                                | Kazakhstan                  | 15,815,626           | 6,039           | 9.2          | 23.3         | 6.3         | 2.4          | 13.0        | 3.4          | 10.6        | 4.8          | 43.7         | 3.2          | 43.2         |                            | HI              | HI              |
|                                                | Kyrgyz Republic             | 4,560,400            | 1,237           | 4.6          | 36.1         | 11.3        | 3.1          | 9.3         | 4.6          | 6.6         | 5.7          | 37.6         | 3.7          | 36.5         |                            |                 |                 |
|                                                | North Macedonia             | 1,983,252            | 4,704           | 1.7          | 8.0          | 9.6         | 2.9          | 10.7        | 3.3          | 15.4        | 2.8          | 46.9         | 0.9          | 55.2         |                            |                 |                 |
|                                                | Romania                     | 22,684,270           | 5,453           | 3.3          | 11.2         | 4.0         | 4.2          | 9.7         | 4.7          | 12.8        | 2.8          | 45.6         | 1.6          | 53.0         |                            |                 |                 |
|                                                | Tajikistan                  | 5,764,712            | 926             | 11.4         | 41.5         |             | 3.6          | 8.2         | 5.1          | 5.5         | 6.8          | 35.0         | 4.3          | 34.1         |                            | HI              | HI              |
|                                                | Turkey                      | 58,486,381           | 7,487           | 5.5          | 27.5         | 7.0         | 4.5          | 17.1        | 6.9          | 13.6        | 2.5          | 58.8         | 2.4          | 49.8         |                            |                 |                 |
| Uzbekistan                                     | 22,785,000                  | 1,635                | 15.5            | 42.8         | 26.1         | 2.9         | 9.7          | 4.4         | 7.0          | 5.8         | 37.9         | 3.5          | 36.8         |              | HI                         | HI              |                 |
| <b>Region Total: Europe &amp; Central Asia</b> |                             | <b>161,231,020</b>   |                 | <b>6.8</b>   | <b>25.2</b>  | <b>9.5</b>  | <b>3.6</b>   | <b>13.2</b> | <b>5.0</b>   | <b>11.7</b> | <b>3.6</b>   | <b>48.8</b>  | <b>2.5</b>   | <b>46.9</b>  | <b>0</b>                   | <b>3</b>        | <b>3</b>        |
| <b>Latin America (LA) &amp; Caribbean</b>      | Argentina                   | 34,994,814           | 10,130          | 1.6          | 7.1          | 11.1        | 1.2          | 25.1        | 1.4          | 27.0        | 1.9          | 52.3         | 1.0          | 54.1         |                            |                 |                 |
|                                                | Bolivia                     | 7,566,714            | 2,994           | 6.8          | 37.9         | 9.7         | 0.9          | 18.5        | 2.5          | 13.0        | 2.2          | 49.0         | 3.0          | 37.9         | HI                         | HI              | HI              |
|                                                | Brazil                      | 162,296,612          | 8,073           | 4.1          | 15.1         | 8.0         | 3.1          | 17.5        | 4.3          | 15.4        | 5.4          | 45.2         | 4.3          | 41.9         |                            |                 |                 |
|                                                | Chile                       | 14,296,613           | 7,366           | 0.5          | 4.2          | 10.1        | 1.1          | 25.0        | 1.2          | 23.4        | 1.6          | 53.9         | 0.9          | 52.2         |                            |                 |                 |
|                                                | Colombia                    | 37,441,977           | 6,156           | 2.4          | 22.9         | 6.2         | 2.4          | 17.2        | 3.2          | 13.6        | 3.7          | 52.3         | 3.7          | 43.1         |                            |                 |                 |
|                                                | Costa Rica                  | 3,510,926            | 6,533           | 2.4          | 8.2          | 9.5         | 2.4          | 17.4        | 3.1          | 13.3        | 4.2          | 48.4         | 3.2          | 40.9         |                            |                 |                 |
|                                                | Dominican Republic          | 7,892,423            | 4,751           | 3.6          | 25.1         | 7.3         | 3.4          | 17.9        | 4.8          | 14.4        | 5.9          | 50.7         | 7.0          | 36.4         |                            |                 |                 |
|                                                | Ecuador                     | 11,440,583           | 5,633           | 3.2          | 32.5         |             | 1.3          | 17.7        | 2.4          | 13.7        | 2.1          | 49.0         | 1.9          | 39.4         | HI                         | HI              | HI              |
|                                                | El Salvador                 | 5,611,115            | 3,911           | 1.4          | 29.5         | 3.9         | 1.7          | 18.5        | 3.2          | 12.9        | 3.7          | 49.4         | 3.5          | 40.8         |                            |                 |                 |
|                                                | Guatemala                   | 10,408,489           | 4,082           | 6.7          | 63.1         | 10.1        | 1.7          | 15.8        | 2.0          | 11.4        | 3.2          | 47.2         | 3.4          | 37.2         | HI                         | HI              | HI              |
|                                                | Guyana                      | 761,291              | 2,852           | 13.3         | 14.0         | 1.9         | 5.3          | 11.6        | 6.9          | 8.3         | 7.4          | 43.2         | 8.6          | 28.7         |                            |                 |                 |
|                                                | Haiti                       | 7,819,806            | 1,275           | 14.4         | 47.3         | 7.8         | 4.9          | 10.0        | 5.6          | 8.7         | 9.7          | 39.5         | 8.0          | 29.0         |                            | HI              | HI              |
|                                                | Honduras                    | 5,709,051            | 2,388           | 2.1          | 42.5         |             | 2.8          | 14.8        | 3.5          | 10.4        | 4.6          | 45.6         | 4.6          | 36.0         | HI                         | HI              | HI              |
|                                                | Jamaica                     | 2,537,440            | 6,159           | 5.3          | 9.1          |             | 1.7          | 16.9        | 2.7          | 12.5        | 5.5          | 51.1         | 9.0          | 31.7         |                            |                 |                 |
|                                                | Mexico                      | 94,045,579           | 8,390           | 8.7          | 30.9         | 9.2         | 2.2          | 23.9        | 2.3          | 23.1        | 2.5          | 57.1         | 2.2          | 50.8         | HI                         | HI              | HI              |
|                                                | Nicaragua                   | 4,612,228            | 2,149           | 5.1          | 35.9         | 11.4        | 1.9          | 18.8        | 3.1          | 13.4        | 3.6          | 50.6         | 4.0          | 41.2         | HI                         | HI              | HI              |
|                                                | Panama                      | 2,739,730            | 6,749           | 1.4          | 21.5         | 6.2         | 2.4          | 18.4        | 3.0          | 13.8        | 4.1          | 49.9         | 3.9          | 41.6         |                            |                 |                 |
| Paraguay                                       | 4,760,850                   | 4,840                | 0.6             | 18.3         | 6.3          | 2.4         | 14.4         | 3.1         | 12.0         | 4.2         | 40.9         | 2.9          | 38.3         |              |                            |                 |                 |
| Peru                                           | 24,038,760                  | 4,540                | 3.1             | 42.7         | 13.6         | 1.1         | 19.5         | 2.2         | 15.6         | 2.1         | 51.4         | 2.0          | 41.9         | HI           | HI                         | HI              |                 |
| Uruguay                                        | 3,224,804                   | 8,393                | 2.3             | 12.8         | 9.0          | 1.7         | 24.9         | 2.1         | 24.1         | 2.1         | 53.7         | 1.7          | 51.8         |              |                            |                 |                 |
| Venezuela                                      | 22,188,667                  | 11,172               | 5.7             | 18.6         | 4.0          | 1.7         | 27.1         | 2.2         | 23.9         | 2.1         | 57.9         | 2.2          | 51.6         |              |                            |                 |                 |
| <b>Region Total: LA &amp; Caribbean</b>        |                             | <b>467,898,472</b>   |                 | <b>4.7</b>   | <b>22.8</b>  | <b>8.2</b>  | <b>2.3</b>   | <b>20.0</b> | <b>3.1</b>   | <b>17.9</b> | <b>3.8</b>   | <b>50.3</b>  | <b>3.2</b>   | <b>44.8</b>  | <b>7</b>                   | <b>8</b>        | <b>8</b>        |
| <b>Middle East &amp; North Africa</b>          | Algeria                     | 28,904,298           | 6,777           | 7.1          | 22.9         | 8.7         | 5.0          | 16.3        | 9.1          | 12.7        | 5.7          | 52.8         | 7.2          | 40.8         |                            |                 |                 |
|                                                | Bahrain                     | 563,699              | 31,276          | 6.6          | 13.6         |             | 4.8          | 26.8        | 7.7          | 23.7        | 4.2          | 62.6         | 4.8          | 52.4         |                            |                 |                 |
|                                                | Djibouti                    | 630,388              | 766             | 14.9         | 31.7         |             | 4.1          | 15.3        | 9.2          | 7.9         | 8.4          | 37.4         | 12.0         | 24.5         |                            | HI              | HI              |
|                                                | Egypt                       | 63,714,386           | 4,588           | 6.6          | 40.5         | 21.8        | 2.4          | 20.7        | 5.6          | 16.3        | 1.9          | 58.3         | 3.2          | 44.7         | HI                         | HI              | HI              |
|                                                | Iran                        | 60,575,644           | 9,069           | 8.1          | 24.4         | 5.5         | 6.7          | 14.9        | 10.4         | 12.1        | 5.3          | 53.4         | 6.3          | 41.5         |                            |                 |                 |
| Iraq                                           | 20,208,387                  | 4,783                | 4.4             | 27.6         |              | 3.8         | 21.3         | 7.7         | 17.7         | 2.9         | 60.2         | 4.0          | 49.6         |              |                            |                 |                 |

(Continued next page...)

Supplemental Table S1 Continued...

| World Bank Region                                | Country                  | Population  | GDP per capita* | Kids (0-4)  |             |             | Girls (5-18) |             | Boys (5-18) |             | Women (19+) |             | Men (19+)   |            | DBM based on Anthrometry** |                 |                 |
|--------------------------------------------------|--------------------------|-------------|-----------------|-------------|-------------|-------------|--------------|-------------|-------------|-------------|-------------|-------------|-------------|------------|----------------------------|-----------------|-----------------|
|                                                  |                          |             |                 | Wasting     | Stunting    | Overweight  | Wasting      | Overweight  | Wasting     | Overweight  | Thin        | Overweight  | Thin        | Overweight | >40% overweight            | >30% overweight | >20% overweight |
| Middle East & North Africa (continued)           | Jordan                   | 4,572,904   | 5,027           | 3.9         | 16.3        | 7.5         | 3.1          | 21.5        | 5.7         | 17.5        | 1.8         | 64.3        | 2.1         | 54.0       |                            |                 |                 |
|                                                  | Kuwait                   | 1,610,651   | 59,070          | 1.7         | 5.0         | 8.9         | 2.2          | 34.7        | 4.4         | 32.8        | 1.4         | 70.9        | 1.7         | 62.8       |                            |                 |                 |
|                                                  | Lebanon                  | 3,033,394   | 9,077           | 3.6         | 17.2        | 20.8        | 3.8          | 24.0        | 6.5         | 23.2        | 3.0         | 62.6        | 2.5         | 55.4       |                            |                 |                 |
|                                                  | Libya                    | 4,948,798   | 16,640          | 3.6         | 21.1        | 13.4        | 4.1          | 22.8        | 7.7         | 19.8        | 2.3         | 62.8        | 3.6         | 51.8       |                            |                 |                 |
|                                                  | Morocco                  | 27,075,232  | 2,855           | 4.5         | 38.7        | 16.6        | 4.8          | 14.6        | 9.6         | 11.1        | 5.2         | 51.5        | 5.5         | 41.5       | HI                         | HI              | HI              |
|                                                  | Oman                     | 2,204,283   | 27,937          | 7.8         | 24.2        | 8.4         | 6.0          | 19.6        | 9.1         | 17.5        | 6.5         | 55.1        | 6.3         | 45.5       |                            |                 |                 |
|                                                  | Qatar                    | 513,455     | 15,849          | 2.1         | 11.6        | 10.4        | 3.7          | 29.2        | 6.1         | 28.6        | 2.3         | 67.6        | 2.5         | 59.1       |                            |                 |                 |
|                                                  | Saudi Arabia             | 18,735,841  | 32,067          | 2.9         | 21.4        | 1.2         | 5.3          | 22.6        | 10.1        | 20.9        | 2.8         | 64.3        | 3.3         | 56.0       |                            |                 |                 |
|                                                  | Syrian Arab Republic     | 14,345,492  | 989             | 10.0        | 32.9        | 15.0        | 5.1          | 15.1        | 9.2         | 11.7        | 4.1         | 53.6        | 4.6         | 43.2       | HI                         | HI              | HI              |
|                                                  | Tunisia                  | 9,113,975   | 4,470           | 7.2         | 11.9        | 1.4         | 4.7          | 15.0        | 9.2         | 9.9         | 4.7         | 55.1        | 5.6         | 42.9       |                            |                 |                 |
| Yemen                                            | 15,320,653               | 2,575       | 14.3            | 52.4        | 8.1         | 9.8         | 7.9          | 19.0        | 5.1         | 12.6        | 37.0        | 8.9         | 29.3        |            | HI                         | HI              |                 |
| <b>Region Total: Middle East &amp; N. Africa</b> | <b>276,071,480</b>       |             | <b>6.8</b>      | <b>30.5</b> | <b>10.9</b> | <b>4.9</b>  | <b>17.5</b>  | <b>9.0</b>  | <b>14.1</b> | <b>4.4</b>  | <b>55.3</b> | <b>5.1</b>  | <b>43.9</b> | <b>3</b>   | <b>5</b>                   | <b>5</b>        |                 |
| South Asia                                       | Afghanistan              | 17,099,541  | 876             | 18.2        | 53.2        | 6.5         | 13.6         | 2.2         | 28.4        | 1.8         | 23.4        | 14.5        | 23.4        | 10.6       |                            |                 |                 |
|                                                  | Bangladesh               | 118,706,871 | 1,048           | 27.9        | 66.8        | 3.6         | 15.7         | 2.1         | 28.1        | 1.9         | 31.7        | 11.8        | 27.3        | 8.9        |                            |                 |                 |
|                                                  | Bhutan                   | 514,877     | 2,112           | 2.5         | 47.7        | 3.9         | 14.2         | 2.1         | 26.7        | 1.9         | 18.7        | 15.5        | 18.4        | 11.9       |                            |                 |                 |
|                                                  | India                    | 960,482,795 | 1,485           | 23.9        | 57.2        | 5.5         | 22.3         | 1.4         | 34.6        | 1.3         | 31.3        | 12.5        | 30.3        | 9.2        |                            |                 |                 |
|                                                  | Maldives                 | 255,000     | 5,672           | 16.1        | 36.1        | 1.2         | 12.0         | 3.5         | 17.3        | 3.4         | 14.7        | 19.1        | 16.8        | 11.9       |                            |                 |                 |
|                                                  | Nepal                    | 21,396,384  | 986             | 17.9        | 62.0        | 1.2         | 12.6         | 1.6         | 26.8        | 1.4         | 25.6        | 11.9        | 22.5        | 10.1       |                            |                 |                 |
|                                                  | Pakistan                 | 122,829,148 | 2,448           | 12.5        | 54.5        | 5.4         | 17.4         | 2.6         | 28.6        | 2.6         | 21.7        | 18.7        | 22.1        | 14.3       |                            |                 |                 |
| Sri Lanka                                        | 18,074,000               | 3,253       | 17.5            | 29.7        |             | 12.0        | 2.9          | 18.6        | 2.6         | 18.9        | 16.2        | 20.9        | 9.9         |            |                            |                 |                 |
| <b>Region Total: South Asia</b>                  | <b>1,259,358,616</b>     |             | <b>22.9</b>     | <b>57.4</b> | <b>5.2</b>  | <b>20.8</b> | <b>1.7</b>   | <b>33.0</b> | <b>1.5</b>  | <b>30.0</b> | <b>13.1</b> | <b>28.8</b> | <b>9.7</b>  | <b>0</b>   | <b>0</b>                   | <b>0</b>        |                 |
| Sub-Saharan Africa                               | Angola                   | 14,268,994  | 1,798           | 8.6         | 61.7        | 1.6         | 7.2          | 4.9         | 16.2        | 1.2         | 15.3        | 20.9        | 20.8        | 10.4       |                            |                 | HI              |
|                                                  | Benin                    | 5,905,558   | 1,105           | 12.3        | 39.1        | 2.4         | 6.2          | 6.4         | 15.1        | 1.9         | 11.9        | 24.3        | 14.4        | 13.2       |                            |                 | HI              |
|                                                  | Botswana                 | 1,569,094   | 6,492           | 13.2        | 35.1        |             | 8.8          | 7.9         | 20.5        | 2.1         | 9.4         | 43.3        | 16.7        | 18.0       | HI                         | HI              | HI              |
|                                                  | Burkina Faso             | 10,089,878  | 651             | 25.3        | 54.6        | 5.7         | 9.3          | 2.8         | 15.4        | 0.8         | 17.4        | 16.1        | 14.4        | 8.9        |                            |                 |                 |
|                                                  | Cameroon                 | 13,460,994  | 1,738           | 10.9        | 43.5        | 10.8        | 5.3          | 8.5         | 12.0        | 2.3         | 9.1         | 27.6        | 10.9        | 15.2       |                            |                 | HI              |
|                                                  | Central African Republic | 3,352,767   | 621             | 12.3        | 46.8        | 5.7         | 6.8          | 5.9         | 15.5        | 1.6         | 15.6        | 22.5        | 21.1        | 11.8       |                            |                 | HI              |
|                                                  | Chad                     | 7,000,722   | 759             | 25.5        | 59.7        | 5.0         | 8.5          | 4.5         | 16.2        | 1.2         | 17.0        | 18.8        | 16.3        | 10.6       |                            |                 |                 |
|                                                  | Comoros                  | 475,394     | 1,048           | 14.0        | 43.7        | 7.0         | 5.2          | 6.8         | 11.8        | 2.3         | 11.7        | 23.9        | 14.9        | 13.1       |                            |                 | HI              |
|                                                  | Congo, Dem. Rep.         | 41,595,744  | 578             | 11.4        | 51.0        |             | 8.0          | 4.9         | 18.1        | 1.2         | 17.5        | 20.1        | 23.1        | 10.3       |                            |                 | HI              |
|                                                  | Cote D'Ivoire            | 14,540,820  | 2,113           | 15.4        | 38.5        | 4.1         | 5.0          | 7.7         | 12.9        | 2.5         | 10.6        | 26.1        | 12.0        | 14.7       |                            |                 | HI              |
|                                                  | Equatorial Guinea        | 504,871     | 1,251           | 4.0         | 38.7        | 3.4         | 6.9          | 5.8         | 15.7        | 1.5         | 13.3        | 23.8        | 20.2        | 12.0       |                            |                 | HI              |
|                                                  | Eritrea                  | 3,090,159   | 1,156           | 11.8        | 69.6        |             | 7.7          | 5.2         | 13.9        | 1.4         | 21.8        | 17.0        | 21.0        | 9.8        |                            |                 |                 |
|                                                  | Ethiopia                 | 57,309,880  | 419             | 9.2         | 66.9        |             | 9.0          | 4.1         | 15.9        | 1.2         | 19.2        | 16.8        | 20.1        | 9.0        |                            |                 |                 |
|                                                  | Gambia                   | 1,066,223   | 1,048           |             | 36.1        |             | 7.6          | 6.6         | 15.1        | 2.1         | 13.3        | 24.4        | 15.2        | 13.4       |                            |                 | HI              |
|                                                  | Ghana                    | 16,760,467  | 1,506           | 17.2        | 36.5        | 3.9         | 5.7          | 6.6         | 14.6        | 1.8         | 10.1        | 26.6        | 14.9        | 12.9       |                            |                 | HI              |
|                                                  | Guinea                   | 7,871,173   | 957             | 16.9        | 47.5        | 8.4         | 7.4          | 5.3         | 15.1        | 1.4         | 13.7        | 21.7        | 15.2        | 11.6       |                            |                 | HI              |
|                                                  | Kenya                    | 27,346,456  | 1,607           | 10.9        | 50.2        | 9.6         | 6.3          | 5.6         | 13.3        | 1.6         | 14.1        | 20.7        | 17.3        | 10.3       |                            |                 | HI              |
|                                                  | Lesotho                  | 1,761,359   | 1,187           | 3.2         | 39.2        |             | 6.7          | 5.4         | 20.5        | 0.8         | 7.8         | 36.9        | 16.0        | 12.3       |                            | HI              | HI              |
|                                                  | Madagascar               | 13,475,400  | 1,021           | 12.2        | 60.0        | 3.9         | 6.6          | 5.1         | 12.0        | 2.0         | 19.2        | 18.2        | 18.0        | 11.1       |                            |                 |                 |
|                                                  | Malawi                   | 9,909,088   | 598             | 10.2        | 66.7        | 14.9        | 4.6          | 5.0         | 12.6        | 1.4         | 13.1        | 19.1        | 16.0        | 10.0       |                            |                 |                 |
|                                                  | Mali                     | 9,604,450   | 955             | 34.7        | 42.4        | 3.0         | 7.1          | 5.2         | 16.7        | 1.4         | 13.9        | 20.8        | 15.0        | 11.4       |                            |                 | HI              |
|                                                  | Mauritania               | 2,327,075   | 2,087           | 17.4        | 54.8        | 6.8         | 6.8          | 7.7         | 16.9        | 2.5         | 11.0        | 27.8        | 14.2        | 15.0       |                            |                 | HI              |
|                                                  | Mozambique               | 15,759,132  | 272             | 14.9        | 49.3        | 7.9         | 3.1          | 7.3         | 6.1         | 2.5         | 13.7        | 21.6        | 16.1        | 11.9       |                            |                 | HI              |
|                                                  | Namibia                  | 1,655,359   | 4,298           | 15.5        | 45.1        | 8.5         | 13.6         | 5.1         | 22.6        | 1.4         | 13.0        | 35.9        | 16.1        | 15.1       |                            | HI              | HI              |
|                                                  | Niger                    | 9,477,333   | 572             | 30.4        | 62.3        | 3.7         | 9.3          | 3.8         | 18.3        | 1.0         | 16.6        | 17.9        | 16.8        | 9.4        |                            |                 |                 |
|                                                  | Nigeria                  | 108,011,465 | 2,005           | 11.8        | 50.5        | 3.2         | 11.1         | 3.9         | 19.5        | 1.4         | 13.4        | 22.0        | 15.0        | 12.4       |                            |                 | HI              |
|                                                  | Rwanda                   | 5,928,078   | 495             | 5.0         | 56.8        | 4.0         | 4.5          | 5.0         | 12.7        | 1.1         | 12.5        | 18.5        | 16.2        | 8.7        |                            |                 |                 |
|                                                  | Senegal                  | 8,746,606   | 1,287           | 18.3        | 50.6        | 9.6         | 9.0          | 6.2         | 17.2        | 1.8         | 13.5        | 24.5        | 16.1        | 12.9       |                            |                 | HI              |
|                                                  | Sierra Leone             | 4,274,819   | 697             | 10.2        | 40.9        |             | 7.7          | 6.4         | 15.0        | 1.8         | 12.9        | 23.7        | 14.6        | 12.3       |                            |                 | HI              |
|                                                  | South Africa             | 41,426,810  | 6,586           |             | 31.5        |             | 15.8         | 6.4         | 25.9        | 2.1         | 4.4         | 54.0        | 10.6        | 25.9       | HI                         | HI              | HI              |
| Tanzania                                         | 29,960,776               | 998         | 13.3            | 61.2        | 9.6         | 5.6         | 5.7          | 12.3        | 1.8         | 14.2        | 21.2        | 15.9        | 12.0        |            |                            | HI              |                 |
| Togo                                             | 4,274,024                | 876         | 18.1            | 34.7        | 3.9         | 5.4         | 5.5          | 15.4        | 1.6         | 12.5        | 22.5        | 14.3        | 12.0        |            |                            | HI              |                 |
| Uganda                                           | 20,550,291               | 668         | 10.1            | 55.5        | 8.1         | 3.9         | 5.4          | 11.3        | 1.1         | 14.3        | 18.7        | 15.4        | 9.3         |            |                            |                 |                 |
| Zambia                                           | 9,137,077                | 1,480       | 10.6            | 58.0        | 7.9         | 4.6         | 7.8          | 11.3        | 3.0         | 11.5        | 25.5        | 17.1        | 13.5        |            |                            | HI              |                 |
| Zimbabwe                                         | 11,320,346               | 1,814       | 7.9             | 32.1        | 9.1         | 6.6         | 6.8          | 19.6        | 1.3         | 6.9         | 40.8        | 14.5        | 15.1        | HI         | HI                         | HI              |                 |
| <b>Region Total: Sub-Saharan Africa</b>          | <b>533,808,682</b>       |             | <b>12.0</b>     | <b>51.1</b> | <b>4.3</b>  | <b>8.3</b>  | <b>5.3</b>   | <b>16.5</b> | <b>1.6</b>  | <b>13.7</b> | <b>24.2</b> | <b>16.3</b> | <b>12.6</b> | <b>3</b>   | <b>5</b>                   | <b>26</b>       |                 |

Data sources: UNICEF-WHO-The World Bank, 2017; NCD-RisC; and Stevens et al., 2013 supplemented for missing preschooler data with DHS measures

\* GDP per capita based on PPP (current international \$) from World Bank Indicators; \*\* Double Burden of Malnutrition (DBM) is based on prevalence of stunting exceeding threshold and prevalence of adult overweight exceeding threshold

Supplemental Table S2. Country burdens by age, sex, and region in 2010s UNICEF and NCD\_RisC surveys with DHS for preschoolers where gaps existed

| World Bank Region                              | Country                     | Population           | GDP per capita* | Kids (0-4)   |              |             | Girls (5-18) |             | Boys (5-18)  |             | Women (19+)  |              | Men (19+)    |              | Kids (0-4) Anemia** | Women (19+) Anemia** | DBM based on Anthrometry** |                 |                 |
|------------------------------------------------|-----------------------------|----------------------|-----------------|--------------|--------------|-------------|--------------|-------------|--------------|-------------|--------------|--------------|--------------|--------------|---------------------|----------------------|----------------------------|-----------------|-----------------|
|                                                |                             |                      |                 | Wasting      | Stunting     | Overweig ht | Wasting      | Overweig ht | Wasting      | Overweig ht | Thin         | Overweig ht  | Thin         | Overweig ht  |                     |                      | >40% overweight            | >30% overweight | >20% overweight |
| <b>Global Total: All Countries</b>             |                             | <b>4,423,919,065</b> |                 | <b>11.20</b> | <b>43.28</b> | <b>6.74</b> | <b>10.03</b> | <b>6.75</b> | <b>15.95</b> | <b>6.20</b> | <b>15.84</b> | <b>24.71</b> | <b>15.32</b> | <b>19.95</b> |                     |                      | <b>14</b>                  | <b>22</b>       | <b>45</b>       |
| <b>East Asia &amp; Pacific</b>                 | Australia                   | 22,031,750           | 39,275          |              |              | 22.0        | 0.4          | 32.6        | 0.9          | 35.6        | 1.7          | 59.8         | 0.3          | 72.9         | 13.9                | 9.1                  |                            |                 |                 |
|                                                | Brunei Darussalam           | 388,662              | 78,923          | 2.9          | 19.7         | 8.3         | 4.9          | 21.7        | 6.0          | 31.8        | 5.9          | 42.9         | 5.6          | 42.5         | 16.1                | 16.9                 |                            |                 |                 |
|                                                | Cambodia                    | 14,308,740           | 2,472           | 9.7          | 32.4         | 2.2         | 8.4          | 8.6         | 13.2         | 13.6        | 13.8         | 25.1         | 12.6         | 19.4         | 54.4                | 46.8                 |                            |                 | HI              |
|                                                | China                       | 1,337,705,000        | 9,333           | 4.6          | 17.1         | 23.4        | 3.3          | 20.8        | 3.5          | 35.0        | 6.1          | 31.1         | 3.8          | 35.6         | 21.4                | 26.4                 |                            |                 |                 |
|                                                | Dem. People's Rep. of Korea | 24,591,599           | 1,800           | 2.5          | 19.1         | 2.3         | 4.8          | 17.4        | 5.0          | 28.5        | 7.6          | 31.7         | 4.8          | 35.1         | 31.3                | 32.5                 |                            |                 |                 |
|                                                | Fiji                        | 859,950              | 7,203           | 6.3          | 7.5          | 5.1         | 3.2          | 39.5        | 4.6          | 29.3        | 1.7          | 69.4         | 1.6          | 61.7         | 37.5                | 31                   |                            |                 |                 |
|                                                | Indonesia                   | 242,524,123          | 8,263           | 10.2         | 30.8         | 8.0         | 8.5          | 14.2        | 11.9         | 16.4        | 12.4         | 32.3         | 12.7         | 26.0         | 36.8                | 28.8                 |                            | HI              | HI              |
|                                                | Japan                       | 128,070,000          | 35,000          | 2.3          | 7.1          | 1.5         | 1.4          | 12.0        | 2.6          | 16.8        | 9.3          | 22.6         | 3.5          | 33.5         | 13.2                | 21.5                 |                            |                 |                 |
|                                                | Lao People's Dem. Republic  | 6,246,274            | 4,133           | 9.0          | 33.1         | 3.5         | 6.4          | 11.6        | 11.3         | 15.5        | 11.1         | 28.9         | 11.0         | 23.4         | 43.8                | 39.7                 |                            |                 | HI              |
|                                                | Malaysia                    | 28,112,289           | 20,680          | 11.5         | 20.7         | 6.0         | 7.0          | 23.3        | 8.0          | 30.2        | 6.8          | 44.4         | 5.7          | 43.4         | 30.8                | 24.9                 |                            |                 |                 |
|                                                | Marshall Islands            | 52,425               | 3,409           | 3.5          | 34.8         | 4.1         | 0.1          | 63.6        | 0.2          | 55.2        | 0.6          | 86.7         | 0.1          | 84.2         | 36.1                | 26.6                 | HI                         | HI              | HI              |
|                                                | Mongolia                    | 2,712,650            | 7,553           | 0.9          | 9.4          | 10.5        | 2.3          | 18.8        | 2.2          | 16.5        | 2.6          | 57.2         | 1.6          | 57.3         | 30.3                | 19.5                 |                            |                 |                 |
|                                                | Myanmar                     | 50,155,896           | 3,646           | 6.6          | 29.4         | 1.5         | 10.6         | 9.9         | 15.3         | 13.4        | 14.1         | 28.8         | 14.5         | 22.1         | 52.9                | 46.3                 |                            |                 |                 |
|                                                | Nauru                       | 10,025               | 6,459           | 1.0          | 24.0         | 2.8         | 0.0          | 68.3        | 0.1          | 61.9        | 0.2          | 90.3         | 0.0          | 89.9         |                     |                      |                            |                 |                 |
|                                                | Papua New Guinea            | 7,108,239            | 3,127           | 14.1         | 49.5         | 13.7        | 0.9          | 37.7        | 1.7          | 25.9        | 2.8          | 59.7         | 1.3          | 49.0         | 48.4                | 36.6                 | HI                         | HI              | HI              |
|                                                | Philippines                 | 93,726,624           | 5,484           | 5.6          | 30.3         | 4.0         | 7.7          | 10.9        | 11.9         | 14.6        | 13.4         | 29.9         | 10.4         | 27.1         | 17.5                | 15.7                 |                            |                 | HI              |
|                                                | Republic Of Korea           | 49,554,112           | 30,377          | 1.2          | 2.5          | 7.3         | 1.3          | 21.1        | 1.3          | 33.7        | 5.2          | 27.3         | 2.8          | 35.0         | 12.3                | 22.7                 |                            |                 |                 |
|                                                | Samoa                       | 186,205              | 5,291           | 3.9          | 4.9          | 5.3         | 0.1          | 57.6        | 0.2          | 47.5        | 0.4          | 83.8         | 0.1          | 75.8         | 43                  | 31.3                 |                            |                 |                 |
|                                                | Singapore                   | 5,076,732            | 70,657          | 3.6          | 4.4          | 2.6         | 2.3          | 18.1        | 2.2          | 27.4        | 7.9          | 28.3         | 3.7          | 37.4         | 16.9                | 22.2                 |                            |                 |                 |
|                                                | Solomon Islands             | 527,790              | 1,834           | 8.5          | 31.7         | 4.5         | 0.7          | 30.0        | 1.5          | 16.7        | 1.9          | 62.0         | 0.9          | 51.2         | 42.9                | 38.9                 | HI                         | HI              | HI              |
| Thailand                                       | 67,208,808                  | 13,214               | 5.4             | 10.5         | 8.2          | 6.9         | 19.3         | 8.5         | 25.1         | 7.9         | 36.8         | 8.6          | 30.3         | 28.3         | 31.8                |                      |                            |                 |                 |
| Timor-Leste                                    | 1,109,591                   | 8,682                | 9.9             | 51.7         | 1.6          | 9.5         | 10.7         | 12.4        | 14.1         | 17.6        | 25.2         | 14.1         | 19.5         | 61.4         | 41.3                |                      |                            | HI              |                 |
| Tonga                                          | 104,137                     | 4,883                | 5.2             | 8.1          | 17.3         | 0.0         | 63.1         | 0.1         | 53.0         | 0.3         | 84.0         | 0.2          | 76.9         | 37.9         | 21.3                |                      |                            |                 |                 |
| Tuvalu                                         | 10,531                      | 2,926                | 3.3             | 10.0         | 6.3          | 0.1         | 63.0         | 0.2         | 54.0         | 0.5         | 85.7         | 0.1          | 82.2         |              |                     |                      |                            |                 |                 |
| Vanuatu                                        | 236,295                     | 2,888                | 4.7             | 28.9         | 4.9          | 1.0         | 37.0         | 1.9         | 24.5         | 2.2         | 63.7         | 1.2          | 53.9         | 28.3         | 24                  |                      |                            |                 |                 |
| Vietnam                                        | 86,932,500                  | 4,319                | 5.8             | 23.8         | 5.9          | 13.1        | 7.6          | 15.4        | 11.6         | 17.9        | 21.3         | 16.8         | 16.4         | 33.9         | 24.2                |                      |                            |                 |                 |
| <b>Region Total: East Asia &amp; Pacific</b>   |                             | <b>2,169,550,947</b> |                 | <b>5.4</b>   | <b>18.6</b>  | <b>17.7</b> | <b>4.6</b>   | <b>18.7</b> | <b>5.5</b>   | <b>29.3</b> | <b>7.8</b>   | <b>31.0</b>  | <b>5.9</b>   | <b>33.4</b>  | <b>23.7</b>         | <b>25.4</b>          | <b>3</b>                   | <b>4</b>        | <b>8</b>        |
| <b>Europe &amp; Central Asia</b>               | Albania                     | 2,913,021            | 9,637           | 1.6          | 11.3         | 16.4        | 1.4          | 20.9        | 1.1          | 29.8        | 2.0          | 52.7         | 0.4          | 66.3         | 24.9                | 25.3                 |                            |                 |                 |
|                                                | Armenia                     | 2,877,311            | 6,567           | 4.4          | 9.4          | 13.7        | 2.0          | 20.0        | 2.3          | 18.5        | 3.2          | 56.1         | 1.7          | 56.0         | 31.5                | 29.4                 |                            |                 |                 |
|                                                | Azerbaijan                  | 9,054,332            | 15,628          | 3.2          | 17.8         | 14.1        | 2.7          | 19.0        | 3.0          | 18.7        | 2.9          | 55.7         | 1.3          | 54.6         | 23.9                | 38.5                 |                            |                 |                 |
|                                                | Belarus                     | 9,490,583            | 15,907          | 2.2          | 4.5          | 9.7         | 2.0          | 18.6        | 1.9          | 26.3        | 2.0          | 58.0         | 0.7          | 64.4         | 25.4                | 22.6                 |                            |                 |                 |
|                                                | Bosnia and Herzegovina      | 3,722,084            | 9,315           | 2.3          | 8.9          | 17.4        | 2.3          | 17.8        | 2.5          | 25.9        | 2.3          | 48.6         | 0.4          | 61.5         | 28.0                | 29.4                 |                            |                 |                 |
|                                                | Bulgaria                    | 7,395,599            | 14,949          | 6.3          | 7.0          | 6.9         | 1.9          | 23.0        | 1.8          | 33.6        | 1.8          | 56.1         | 0.3          | 70.8         | 26.9                | 26.4                 |                            |                 |                 |
|                                                | Czechia                     | 10,474,410           | 27,694          | 4.6          | 2.7          | 4.4         | 1.9          | 21.9        | 1.7          | 32.2        | 1.5          | 56.7         | 0.2          | 71.4         | 25.8                | 25.7                 |                            |                 |                 |
|                                                | Georgia                     | 3,926,000            | 6,598           | 1.6          | 11.3         | 19.9        | 3.1          | 19.0        | 2.4          | 20.7        | 3.3          | 55.2         | 1.3          | 56.4         | 23.6                | 27.5                 |                            |                 |                 |
|                                                | Germany                     | 81,776,930           | 39,226          | 0.3          | 1.7          | 3.2         | 0.8          | 24.7        | 1.5          | 28.4        | 1.7          | 50.1         | 0.3          | 66.8         | 12.4                | 16.3                 |                            |                 |                 |
|                                                | Kazakhstan                  | 16,321,581           | 19,690          | 3.1          | 8.0          | 9.3         | 2.5          | 19.0        | 2.3          | 19.9        | 3.4          | 54.3         | 1.7          | 56.0         | 29.3                | 30.7                 |                            |                 |                 |
|                                                | Kyrgyz Republic             | 5,447,900            | 2,734           | 2.0          | 11.8         | 6.9         | 3.3          | 16.1        | 3.3          | 16.0        | 3.7          | 50.4         | 2.0          | 49.0         | 38.3                | 36.2                 |                            |                 |                 |
|                                                | Moldova                     | 3,562,045            | 3,832           | 1.9          | 6.4          | 4.9         | 2.9          | 15.4        | 2.6          | 19.3        | 2.4          | 51.7         | 1.0          | 55.1         | 26.3                | 26.8                 |                            |                 |                 |
|                                                | Montenegro                  | 619,428              | 13,648          | 2.8          | 9.4          | 22.3        | 2.2          | 19.6        | 1.4          | 30.0        | 2.2          | 54.2         | 0.4          | 68.2         | 26.9                | 25.2                 |                            |                 |                 |
|                                                | North Macedonia             | 2,070,739            | 11,285          | 1.8          | 4.9          | 12.4        | 2.2          | 20.9        | 2.1          | 30.9        | 2.2          | 52.8         | 0.5          | 66.8         | 25.1                | 23.3                 |                            |                 |                 |
|                                                | Poland                      | 38,042,794           | 21,069          |              | 2.6          |             | 2.1          | 20.0        | 1.9          | 31.1        | 2.3          | 52.9         | 0.6          | 67.6         | 26.3                | 25.7                 |                            |                 |                 |
|                                                | Romania                     | 20,246,871           | 17,027          | 3.5          | 12.8         | 8.3         | 2.8          | 19.7        | 2.4          | 29.2        | 2.1          | 52.8         | 0.8          | 66.2         | 26.8                | 26.7                 |                            |                 |                 |
|                                                | Serbia                      | 7,291,436            | 12,087          | 3.9          | 6.0          | 13.9        | 2.2          | 22.1        | 1.9          | 32.8        | 2.6          | 52.2         | 0.5          | 65.7         | 26.4                | 27.2                 |                            |                 |                 |
|                                                | Tajikistan                  | 7,641,630            | 2,064           | 5.6          | 17.5         | 3.3         | 3.5          | 15.3        | 3.8          | 14.0        | 4.5          | 47.8         | 2.6          | 45.8         | 31.3                | 30.5                 |                            |                 |                 |
|                                                | Turkey                      | 72,326,914           | 17,443          | 1.7          | 6.0          | 8.1         | 4.6          | 28.7        | 5.1          | 30.4        | 1.5          | 71.4         | 0.9          | 66.0         | 28.0                | 30.9                 |                            |                 |                 |
|                                                | Turkmenistan                | 5,087,210            | 9,741           | 4.2          | 11.5         | 5.9         | 3.2          | 18.0        | 3.3          | 17.9        | 3.6          | 53.1         | 1.7          | 53.7         | 28.1                | 32.6                 |                            |                 |                 |
| Ukraine                                        | 45,870,700                  | 7,666                | 8.2             | 22.9         | 26.5         | 2.3         | 18.1         | 2.4         | 24.2         | 1.9         | 57.2         | 0.7          | 63.2         | 26.0         | 23.5                |                      |                            |                 |                 |
| Uzbekistan                                     | 28,562,400                  | 4,154                | 1.8             | 10.8         | 4.6          | 2.9         | 16.9         | 3.2         | 16.3         | 3.8         | 50.5         | 2.0          | 48.9         | 36.6         | 36.2                |                      |                            |                 |                 |
| <b>Region Total: Europe &amp; Central Asia</b> |                             | <b>384,721,918</b>   |                 | <b>2.6</b>   | <b>8.3</b>   | <b>8.6</b>  | <b>2.5</b>   | <b>22.0</b> | <b>2.7</b>   | <b>26.5</b> | <b>2.2</b>   | <b>56.4</b>  | <b>0.9</b>   | <b>63.1</b>  | <b>24.8</b>         | <b>26.1</b>          | <b>0</b>                   | <b>0</b>        | <b>0</b>        |

(continued next page...)

Supplemental Table S2 Continued...

| World Bank Region                                   | Country              | Population           | GDP per capita* | Kids (0-4)  |             |             | Girls (5-18) |             | Boys (5-18) |             | Women (19+) |             | Men (19+)   |             | Kids (0-4)  | Women (19+) | DBM based on Anthrometry** |          |                 |
|-----------------------------------------------------|----------------------|----------------------|-----------------|-------------|-------------|-------------|--------------|-------------|-------------|-------------|-------------|-------------|-------------|-------------|-------------|-------------|----------------------------|----------|-----------------|
|                                                     |                      |                      |                 | Wasting     | Stunting    | Overweig ht | Wasting      | Overweig ht | Wasting     | Overweig ht | Thin        | Overweig ht | Thin        | Overweig ht |             |             | Anemia**                   | Anemia** | >40% overweight |
| Latin America & Caribbean                           | Argentina            | 41,223,889           | 18,334          | 1.6         | 7.9         | 13.6        | 1.0          | 31.9        | 0.9         | 41.0        | 1.1         | 61.0        | 0.3         | 68.0        | 22.2        | 18.6        |                            |          |                 |
|                                                     | Barbados             | 279,569              | 16,086          | 6.8         | 7.7         | 12.2        | 3.8          | 28.1        | 3.8         | 27.3        | 2.8         | 61.7        | 3.3         | 46.3        | 31.9        | 21.6        |                            |          |                 |
|                                                     | Belize               | 321,608              | 7,717           | 1.8         | 15.0        | 7.3         | 3.4          | 28.7        | 3.5         | 28.3        | 2.7         | 63.1        | 3.3         | 49.7        | 22.5        | 21.7        |                            |          |                 |
|                                                     | Bolivia              | 9,918,242            | 5,298           | 2.0         | 16.1        | 10.1        | 0.7          | 29.9        | 1.6         | 26.2        | 1.3         | 61.3        | 1.3         | 53.8        | 46.9        | 30.2        |                            |          |                 |
|                                                     | Brazil               | 196,796,269          | 14,243          | 1.8         | 7.0         | 6.4         | 2.4          | 26.6        | 3.0         | 30.0        | 3.1         | 57.1        | 1.8         | 59.4        | 25.1        | 27.2        |                            |          |                 |
|                                                     | Chile                | 16,993,354           | 18,265          | 0.3         | 1.8         | 9.3         | 0.8          | 33.6        | 0.8         | 37.4        | 0.9         | 63.0        | 0.3         | 66.5        | 20.0        | 15.0        |                            |          |                 |
|                                                     | Colombia             | 45,918,097           | 10,680          | 1.6         | 12.7        | 5.7         | 1.7          | 26.3        | 2.3         | 22.5        | 2.4         | 63.0        | 1.6         | 58.4        | 26.6        | 21.1        |                            |          |                 |
|                                                     | Costa Rica           | 4,545,280            | 12,737          | 1.0         | 5.6         | 8.1         | 1.5          | 33.1        | 1.9         | 30.3        | 2.1         | 65.0        | 1.0         | 61.7        | 28.7        | 14.9        |                            |          |                 |
|                                                     | Cuba                 | 11,333,051           | 5,730           | 2.4         | 7.0         |             | 3.3          | 29.3        | 3.5         | 31.4        | 4.3         | 64.3        | 3.9         | 56.3        | 29.3        | 25.1        |                            |          |                 |
|                                                     | Dominican Republic   | 9,897,985            | 10,907          | 2.4         | 7.1         | 7.6         | 3.3          | 32.5        | 3.3         | 33.0        | 3.1         | 67.2        | 2.6         | 58.7        | 28.0        | 29.7        |                            |          |                 |
|                                                     | Ecuador              | 14,934,690           | 9,163           | 1.6         | 23.9        | 8.0         | 0.9          | 29.1        | 1.5         | 27.4        | 1.2         | 60.7        | 0.9         | 54.2        | 27.7        | 18.8        |                            |          |                 |
|                                                     | El Salvador          | 6,164,626            | 6,173           | 2.1         | 13.6        | 6.4         | 1.2          | 33.5        | 2.0         | 28.0        | 2.0         | 63.9        | 1.3         | 58.8        | 30.6        | 22.7        |                            |          |                 |
|                                                     | Guatemala            | 14,630,417           | 6,578           | 0.8         | 46.7        | 4.9         | 1.1          | 30.6        | 1.3         | 26.2        | 1.7         | 61.5        | 1.5         | 53.1        | 36.5        | 16.4        | HI                         | HI       | HI              |
|                                                     | Guyana               | 746,556              | 5,730           | 6.4         | 11.3        | 5.3         | 5.4          | 25.8        | 5.3         | 23.9        | 4.2         | 58.4        | 4.8         | 43.0        | 37.9        | 32.3        |                            |          |                 |
|                                                     | Haiti                | 9,999,617            | 1,472           | 3.7         | 21.9        | 3.4         | 4.4          | 24.5        | 3.4         | 30.4        | 4.6         | 60.1        | 3.1         | 52.8        | 58.2        | 46.2        |                            |          |                 |
|                                                     | Honduras             | 8,194,778            | 3,891           | 1.4         | 22.6        | 5.2         | 1.9          | 29.6        | 2.3         | 24.9        | 2.4         | 61.2        | 2.0         | 53.5        | 31.4        | 17.8        |                            |          |                 |
|                                                     | Jamaica              | 2,817,210            | 7,834           | 3.6         | 6.0         | 8.3         | 1.8          | 30.9        | 1.9         | 29.2        | 3.1         | 65.0        | 4.3         | 49.0        | 27.7        | 22.5        |                            |          |                 |
|                                                     | Mexico               | 117,318,941          | 14,859          | 2.0         | 10.0        | 5.3         | 1.4          | 35.2        | 1.6         | 35.8        | 1.5         | 67.6        | 0.8         | 65.4        | 28.2        | 14.6        |                            |          |                 |
|                                                     | Nicaragua            | 5,737,723            | 3,947           | 2.2         | 17.3        | 8.3         | 1.3          | 31.9        | 2.2         | 26.6        | 2.1         | 63.0        | 1.8         | 56.4        | 29.2        | 16.3        |                            |          |                 |
|                                                     | Panama               | 3,643,222            | 15,312          | 1.2         | 19.0        | 9.7         | 1.7          | 32.0        | 2.1         | 26.9        | 2.4         | 63.0        | 1.6         | 58.0        | 28.7        | 23.4        |                            |          |                 |
| Paraguay                                            | 6,209,877            | 7,142                | 1.0             | 5.6         | 12.4        | 1.8         | 26.9         | 2.1         | 28.8        | 2.1         | 54.8        | 1.2         | 55.4        | 25.7        | 22.8        |             |                            |          |                 |
| Peru                                                | 29,373,646           | 9,755                | 0.5             | 12.2        | 8.6         | 0.8         | 27.9         | 1.3         | 26.2        | 1.4         | 61.6        | 0.9         | 56.5        | 31.9        | 18.5        |             |                            |          |                 |
| Saint Lucia                                         | 172,580              | 11,879               | 3.7             | 2.5         | 6.3         | 4.2         | 24.6         | 4.4         | 22.6        | 3.5         | 58.1        | 4.8         | 40.7        | 35.3        | 21.9        |             |                            |          |                 |
| Suriname                                            | 526,103              | 13,924               | 5.0             | 8.8         | 4.0         | 3.8         | 30.1         | 3.3         | 32.2        | 2.8         | 66.1        | 3.2         | 55.1        | 34.3        | 24.1        |             |                            |          |                 |
| Trinidad And Tobago                                 | 1,328,100            | 30,629               | 6.4             | 9.2         | 11.4        | 5.6         | 25.2         | 5.9         | 24.2        | 3.3         | 56.2        | 3.8         | 38.4        | 32.1        | 23.6        |             |                            |          |                 |
| Uruguay                                             | 3,374,415            | 16,737               | 1.3             | 10.7        | 7.2         | 1.4         | 31.1         | 1.5         | 35.9        | 1.2         | 62.6        | 0.6         | 66.8        | 23.1        | 20.8        |             |                            |          |                 |
| Venezuela                                           | 29,028,033           | 16,210               | 4.1             | 13.4        | 6.4         | 1.4         | 35.0         | 1.7         | 33.1        | 1.6         | 65.5        | 0.9         | 64.7        | 30.0        | 23.9        |             |                            |          |                 |
| <b>Region Total: Latin America &amp; Caribbean</b>  |                      | <b>591,427,878</b>   |                 | <b>1.9</b>  | <b>10.8</b> | <b>6.9</b>  | <b>1.8</b>   | <b>29.9</b> | <b>2.2</b>  | <b>31.2</b> | <b>2.3</b>  | <b>61.7</b> | <b>1.4</b>  | <b>60.6</b> | <b>27.7</b> | <b>22.1</b> | <b>1</b>                   | <b>1</b> | <b>1</b>        |
| Middle East & North Africa                          | Algeria              | 36,117,637           | 12,610          | 4.1         | 11.7        | 12.4        | 4.9          | 30.0        | 6.9         | 31.2        | 3.3         | 68.1        | 3.3         | 59.7        | 30.0        | 35.7        |                            |          |                 |
|                                                     | Bahrain              | 1,240,862            | 39,750          | 6.6         | 13.6        |             | 5.6          | 33.7        | 6.5         | 36.5        | 3.3         | 70.5        | 2.4         | 66.0        | 30.1        | 42.0        |                            |          |                 |
|                                                     | Djibouti             | 851,146              | 1,326           | 21.5        | 33.5        | 8.1         | 3.6          | 21.3        | 7.4         | 12.9        | 7.1         | 46.1        | 8.5         | 33.6        | 42.0        | 32.7        | HI                         | HI       | HI              |
|                                                     | Egypt                | 84,107,606           | 9,658           | 9.5         | 22.3        | 15.7        | 2.0          | 37.2        | 3.5         | 35.8        | 1.0         | 71.3        | 1.5         | 59.0        | 31.7        | 28.5        |                            |          |                 |
|                                                     | Iran                 | 74,567,511           | 17,580          | 4.0         | 6.8         |             | 7.3          | 25.0        | 9.7         | 26.1        | 3.5         | 67.4        | 3.1         | 59.5        | 28.2        | 30.5        |                            |          |                 |
|                                                     | Iraq                 | 30,762,701           | 12,460          | 3.0         | 12.6        | 6.1         | 4.0          | 31.6        | 6.4         | 31.9        | 2.0         | 70.0        | 2.0         | 62.9        | 24.1        | 29.1        |                            |          |                 |
|                                                     | Jordan               | 7,182,390            | 9,281           | 2.4         | 7.8         | 4.7         | 3.4          | 30.6        | 4.5         | 31.1        | 1.2         | 74.2        | 0.8         | 68.9        | 31.1        | 34.7        |                            |          |                 |
|                                                     | Kuwait               | 2,998,083            | 73,683          | 2.5         | 6.4         | 5.5         | 3.1          | 39.9        | 3.8         | 44.7        | 1.1         | 77.0        | 0.7         | 74.2        | 25.3        | 23.8        |                            |          |                 |
|                                                     | Lebanon              | 4,337,141            | 16,119          | 6.6         | 16.5        | 16.7        | 4.5          | 30.4        | 5.5         | 36.6        | 2.2         | 71.1        | 1.1         | 68.8        | 25.0        | 31.2        |                            |          |                 |
|                                                     | Libya                | 6,169,140            | 29,031          | 10.2        | 38.1        | 29.6        | 4.7          | 31.3        | 6.6         | 33.5        | 1.7         | 72.0        | 1.8         | 65.3        | 28.8        | 32.5        | HI                         | HI       | HI              |
|                                                     | Morocco              | 32,409,639           | 6,313           | 2.6         | 15.1        | 10.9        | 5.0          | 27.1        | 7.7         | 27.0        | 3.1         | 66.0        | 2.6         | 58.3        | 34.0        | 36.9        |                            |          |                 |
|                                                     | Oman                 | 3,041,460            | 44,419          | 9.3         | 11.4        | 4.2         | 6.7          | 30.2        | 7.4         | 34.2        | 4.3         | 67.6        | 3.0         | 62.5        | 38.4        | 38.2        |                            |          |                 |
|                                                     | Qatar                | 1,779,676            | 122,609         | 2.1         | 11.6        | 10.4        | 4.7          | 35.1        | 5.3         | 41.5        | 1.7         | 75.3        | 1.0         | 72.9        | 26.3        | 27.7        |                            |          |                 |
|                                                     | Saudi Arabia         | 27,425,676           | 44,502          | 11.8        | 9.3         | 6.1         | 6.2          | 32.1        | 8.7         | 38.1        | 2.1         | 73.7        | 1.5         | 70.1        | 37.8        | 42.9        |                            |          |                 |
|                                                     | Syrian Arab Republic | 21,018,834           | 6,375           | 11.5        | 27.9        | 17.9        | 5.2          | 27.7        | 7.1         | 28.8        | 2.5         | 67.4        | 2.2         | 59.1        | 34.9        | 33.6        |                            |          |                 |
|                                                     | Tunisia              | 10,639,931           | 10,225          | 2.1         | 8.4         | 17.2        | 5.1          | 25.9        | 7.9         | 24.0        | 3.0         | 67.8        | 2.8         | 59.0        | 28.8        | 31.2        |                            |          |                 |
| Yemen                                               | 23,606,779           | 4,388                | 16.4            | 46.4        | 2.5         | 10.2        | 20.7         | 16.7        | 19.2        | 7.6         | 55.1        | 5.0         | 45.7        | 83.5        | 69.6        | HI          | HI                         | HI       |                 |
| <b>Region Total: Middle East &amp; North Africa</b> |                      | <b>368,256,212</b>   |                 | <b>7.0</b>  | <b>16.8</b> | <b>9.3</b>  | <b>5.1</b>   | <b>30.0</b> | <b>7.4</b>  | <b>30.6</b> | <b>2.7</b>  | <b>68.5</b> | <b>2.5</b>  | <b>60.0</b> | <b>34.1</b> | <b>34.8</b> | <b>3</b>                   | <b>3</b> | <b>3</b>        |
| South Asia                                          | Afghanistan          | 28,803,167           | 1,582           | 5.1         | 38.2        | 4.1         | 10.9         | 9.8         | 23.1        | 8.9         | 15.6        | 27.1        | 16.7        | 20.5        | 46.4        | 42.0        |                            |          | HI              |
|                                                     | Bangladesh           | 152,149,102          | 2,393           | 8.4         | 30.8        | 2.2         | 13.6         | 8.7         | 22.3        | 9.3         | 22.8        | 23.0        | 19.7        | 18.7        | 40.3        | 39.9        |                            |          | HI              |
|                                                     | Bhutan               | 727,641              | 6,290           | 5.9         | 33.5        | 7.6         | 11.5         | 9.5         | 19.7        | 10.8        | 10.4        | 30.7        | 10.7        | 26.2        | 43.5        | 35.6        |                            |          | HI              |
|                                                     | India                | 1,230,980,691        | 4,316           | 17.3        | 34.7        | 1.6         | 22.7         | 6.1         | 30.7        | 7.5         | 23.7        | 22.4        | 22.6        | 18.5        | 57.3        | 51.4        |                            |          | HI              |
|                                                     | Maldives             | 367,000              | 11,763          | 12.0        | 20.7        | 6.6         | 13.3         | 14.2        | 14.1        | 19.5        | 8.2         | 35.4        | 9.5         | 28.0        | 39.0        | 42.6        |                            |          | HI              |
|                                                     | Nepal                | 27,023,137           | 1,946           | 9.6         | 36.1        | 1.2         | 10.3         | 7.8         | 21.1        | 7.2         | 17.2        | 23.7        | 15.6        | 19.9        | 42.7        | 35.1        |                            |          | HI              |
|                                                     | Pakistan             | 170,560,182          | 4,197           | 7.1         | 37.6        | 2.5         | 15.3         | 9.1         | 23.1        | 10.1        | 14.4        | 32.4        | 14.8        | 26.7        | 58.8        | 52.1        |                            |          | HI              |
| Sri Lanka                                           | 20,119,000           | 8,357                | 15.1            | 17.3        | 2.0         | 13.4        | 11.7         | 16.6        | 13.9        | 12.5        | 28.3        | 14.8        | 19.4        | 25.6        | 32.6        |             |                            | HI       |                 |
| <b>Region Total: South Asia</b>                     |                      | <b>1,630,729,920</b> |                 | <b>15.0</b> | <b>34.5</b> | <b>1.8</b>  | <b>20.5</b>  | <b>6.9</b>  | <b>28.6</b> | <b>8.0</b>  | <b>22.3</b> | <b>23.7</b> | <b>21.2</b> | <b>19.5</b> | <b>55.0</b> | <b>49.7</b> | <b>0</b>                   | <b>2</b> | <b>6</b>        |

(continued next page...)

Supplemental Table S2 continued...

| World Bank Region               | Country                  | Population         | GDP per capita* | Kids (0-4) |             |             | Girls (5-18) |             | Boys (5-18) |             | Women (19+) |             | Men (19+)   |             | Kids (0-4)  | Women (19+) | DBM based on Anthrometry** |                 |                 |
|---------------------------------|--------------------------|--------------------|-----------------|------------|-------------|-------------|--------------|-------------|-------------|-------------|-------------|-------------|-------------|-------------|-------------|-------------|----------------------------|-----------------|-----------------|
|                                 |                          |                    |                 | Wasting    | Stunting    | Overweig ht | Wasting      | Overweig ht | Wasting     | Overweig ht | Thin        | Overweig ht | Thin        | Overweig ht | Anemia**    | Anemia**    | >40% overweight            | >30% overweight | >20% overweight |
| Sub-Saharan Africa              | Angola                   | 23,369,131         | 5,778           | 4.9        | 37.6        | 3.4         | 5.2          | 14.8        | 11.2        | 6.9         | 10.6        | 36.1        | 15.9        | 20.3        | 50.9        | 47.7        |                            | HI              | HI              |
|                                 | Benin                    | 9,199,259          | 1,782           | 5.0        | 32.2        | 1.9         | 3.8          | 15.5        | 9.8         | 7.0         | 8.4         | 38.6        | 10.3        | 22.0        | 62.1        | 46.9        |                            | HI              | HI              |
|                                 | Botswana                 | 2,014,866          | 13,064          | 7.3        | 28.9        | 10.0        | 2.9          | 24.6        | 9.6         | 10.4        | 6.2         | 58.3        | 11.6        | 30.8        | 40.4        | 30.2        |                            |                 |                 |
|                                 | Burkina Faso             | 15,605,217         | 1,395           | 8.4        | 24.9        | 1.0         | 5.6          | 10.1        | 9.9         | 5.1         | 12.5        | 30.3        | 10.4        | 16.7        | 86.2        | 49.6        |                            |                 |                 |
|                                 | Burundi                  | 8,766,930          | 748             | 4.8        | 54.0        | 2.8         | 4.8          | 14.2        | 9.7         | 6.2         | 10.9        | 31.1        | 14.0        | 14.5        | 47.3        | 26.7        |                            | HI              | HI              |
|                                 | Cabo Verde               | 502,384            | 5,710           | 6.9        | 21.4        |             | 4.1          | 16.3        | 9.2         | 8.6         | 6.9         | 42.8        | 8.2         | 28.5        | 55.1        | 33.3        |                            |                 |                 |
|                                 | Cameroon                 | 19,970,495         | 2,871           | 4.3        | 28.9        | 11.0        | 3.1          | 17.4        | 7.8         | 7.9         | 6.0         | 43.0        | 7.0         | 26.2        | 62.5        | 41.4        |                            |                 |                 |
|                                 | Central African Republic | 4,448,525          | 863             | 6.5        | 37.5        | 1.0         | 5.2          | 14.5        | 11.3        | 6.6         | 12.0        | 34.4        | 17.2        | 19.1        | 71.9        | 46.0        |                            | HI              | HI              |
|                                 | Chad                     | 11,887,202         | 1,886           | 13.3       | 39.8        | 2.8         | 5.8          | 11.8        | 10.9        | 5.4         | 13.0        | 30.9        | 12.9        | 16.6        | 73.3        | 47.7        |                            | HI              | HI              |
|                                 | Comoros                  | 689,692            | 1,384           | 11.2       | 31.1        | 10.6        | 4.0          | 16.9        | 9.0         | 7.3         | 8.2         | 36.9        | 11.6        | 19.0        | 48.1        | 29.3        |                            | HI              | HI              |
|                                 | Congo, Dem. Rep.         | 64,523,263         | 647             | 8.1        | 42.7        | 4.4         | 5.7          | 14.0        | 13.0        | 6.1         | 12.9        | 33.2        | 18.5        | 18.7        | 63.2        | 41.0        |                            | HI              | HI              |
|                                 | Congo, Rep.              | 4,386,693          | 5,081           | 8.2        | 21.2        | 5.9         | 4.7          | 13.7        | 9.9         | 7.8         | 11.1        | 38.7        | 14.5        | 25.2        | 64.3        | 51.9        |                            |                 |                 |
|                                 | Cote d'Ivoire            | 20,401,331         | 2,636           | 6.1        | 21.6        | 1.5         | 2.8          | 16.9        | 8.1         | 8.8         | 7.3         | 40.8        | 7.9         | 25.5        | 73.4        | 52.9        |                            |                 |                 |
|                                 | Equatorial Guinea        | 951,104            | 33,041          | 3.1        | 26.2        | 9.7         | 5.2          | 14.6        | 11.3        | 6.6         | 9.8         | 36.7        | 16.2        | 19.5        | 64.0        | 43.7        |                            |                 |                 |
|                                 | Eritrea                  | 4,390,840          | 1,388           | 14.6       | 52.5        | 2.1         | 5.9          | 15.2        | 10.5        | 6.3         | 16.6        | 29.3        | 17.5        | 15.4        | 56.6        | 38.1        |                            |                 | HI              |
|                                 | Ethiopia                 | 87,702,670         | 1,052           | 7.2        | 36.8        | 2.1         | 7.2          | 12.5        | 13.4        | 4.6         | 14.2        | 29.0        | 16.7        | 14.0        | 50.0        | 23.4        |                            |                 | HI              |
|                                 | Gabon                    | 1,640,210          | 15,045          | 3.4        | 17.0        | 7.7         | 3.3          | 19.5        | 8.6         | 11.5        | 6.5         | 48.0        | 10.6        | 35.1        | 62.5        | 59.1        |                            |                 |                 |
|                                 | Gambia                   | 1,692,149          | 1,611           | 6.2        | 19.0        | 1.2         | 4.9          | 15.1        | 9.5         | 8.1         | 9.2         | 40.2        | 10.0        | 25.5        | 75.7        | 57.5        |                            |                 |                 |
|                                 | Ghana                    | 24,512,104         | 2,997           | 6.8        | 17.5        | 1.4         | 3.2          | 15.1        | 9.0         | 6.3         | 6.8         | 42.3        | 10.0        | 23.0        | 66.9        | 46.4        |                            |                 |                 |
|                                 | Guinea                   | 10,794,170         | 1,542           | 9.2        | 30.3        | 5.6         | 4.7          | 13.4        | 9.8         | 5.5         | 9.8         | 35.4        | 11.2        | 19.5        | 74.4        | 50.6        |                            | HI              | HI              |
|                                 | Guinea-Bissau            | 1,555,880          | 1,372           | 6.0        | 27.6        | 2.3         | 4.2          | 14.5        | 9.9         | 7.1         | 8.7         | 38.5        | 9.9         | 23.1        | 68.1        | 43.8        |                            |                 |                 |
|                                 | Kenya                    | 41,350,152         | 2,426           | 4.2        | 26.2        | 4.1         | 4.7          | 16.2        | 10.5        | 6.2         | 9.4         | 35.5        | 13.7        | 16.8        | 41.1        | 27.2        |                            |                 |                 |
|                                 | Lesotho                  | 2,040,551          | 2,318           | 2.1        | 34.6        | 6.6         | 1.6          | 24.7        | 9.1         | 6.2         | 4.3         | 55.3        | 11.5        | 22.0        | 50.4        | 27.4        | HI                         | HI              | HI              |
|                                 | Liberia                  | 3,948,125          | 686             | 4.3        | 30.1        | 2.7         | 3.5          | 14.2        | 9.2         | 6.1         | 7.6         | 39.6        | 8.2         | 24.1        | 68.6        | 34.7        |                            | HI              | HI              |
|                                 | Madagascar               | 21,151,640         | 1,358           | 6.4        | 41.6        | 1.4         | 5.3          | 13.4        | 8.8         | 7.9         | 14.4        | 30.7        | 13.9        | 18.5        | 48.8        | 36.8        |                            | HI              | HI              |
|                                 | Malawi                   | 15,167,095         | 1,012           | 1.3        | 39.0        | 2.5         | 3.0          | 14.8        | 9.5         | 6.3         | 8.8         | 32.6        | 12.6        | 15.4        | 59.2        | 34.4        |                            | HI              | HI              |
|                                 | Mali                     | 15,075,085         | 1,834           | 9.0        | 26.9        | 2.0         | 4.3          | 14.6        | 10.7        | 6.7         | 9.4         | 36.4        | 10.5        | 21.2        | 83.4        | 51.3        |                            |                 |                 |
|                                 | Mauritania               | 3,609,543          | 3,250           | 11.5       | 22.8        | 1.5         | 4.2          | 17.4        | 11.0        | 9.0         | 7.5         | 43.8        | 9.4         | 27.0        | 67.9        | 37.2        |                            |                 |                 |
|                                 | Mauritius                | 1,250,400          | 15,616          | 15.7       | 13.6        | 6.5         | 4.8          | 18.4        | 8.9         | 11.2        | 6.9         | 41.2        | 8.7         | 25.3        | 39.1        | 25.1        |                            |                 |                 |
|                                 | Mozambique               | 24,221,405         | 899             | 4.4        | 42.3        | 7.0         | 2.8          | 17.0        | 4.2         | 7.8         | 9.7         | 34.8        | 12.2        | 18.7        | 60.2        | 51.0        |                            | HI              | HI              |
|                                 | Namibia                  | 2,173,170          | 8,290           | 7.1        | 22.7        | 4.0         | 5.5          | 20.8        | 10.8        | 9.8         | 8.1         | 53.6        | 10.8        | 28.3        | 47.1        | 23.2        |                            |                 |                 |
|                                 | Niger                    | 16,425,578         | 798             | 14.1       | 48.5        | 1.0         | 6.2          | 11.3        | 12.5        | 5.0         | 12.3        | 30.7        | 13.3        | 15.2        | 77.3        | 49.5        |                            | HI              | HI              |
|                                 | Nigeria                  | 158,578,261        | 5,046           | 6.8        | 36.8        | 2.1         | 7.6          | 10.3        | 11.6        | 6.5         | 9.3         | 37.4        | 10.6        | 22.6        | 68.3        | 49.8        |                            | HI              | HI              |
|                                 | Rwanda                   | 10,246,842         | 1,338           | 2.0        | 36.9        | 5.6         | 2.8          | 16.9        | 8.8         | 5.2         | 7.4         | 34.7        | 11.5        | 16.2        | 36.2        | 22.3        |                            | HI              | HI              |
|                                 | Sao Tome and Principe    | 174,776            | 2,588           | 4.0        | 17.2        | 2.4         | 2.6          | 16.6        | 8.1         | 9.5         | 7.3         | 43.0        | 6.7         | 29.3        | 65.3        | 46.1        |                            |                 |                 |
|                                 | Senegal                  | 12,916,229         | 2,140           | 8.1        | 18.8        | 2.6         | 6.3          | 13.4        | 12.4        | 5.7         | 10.3        | 37.1        | 12.2        | 20.3        | 67.9        | 49.9        |                            |                 |                 |
|                                 | Seychelles               | 89,770             | 19,953          | 4.3        | 7.9         | 10.2        | 4.7          | 24.3        | 6.7         | 21.1        | 4.9         | 46.6        | 7.4         | 29.6        | 35.0        | 22.3        |                            |                 |                 |
|                                 | Sierra Leone             | 6,458,720          | 1,176           | 5.4        | 29.5        | 4.5         | 4.8          | 15.1        | 9.7         | 6.3         | 9.3         | 37.2        | 10.6        | 19.9        | 77.3        | 48.0        |                            |                 |                 |
|                                 | Somalia                  | 12,053,223         | 1,176           | 14.3       | 25.3        | 3.0         | 4.3          | 17.2        | 8.7         | 8.4         | 9.1         | 37.2        | 11.7        | 21.1        | 55.8        | 44.4        |                            |                 |                 |
|                                 | South Africa             | 50,979,432         | 11,647          | 2.5        | 27.4        | 13.3        | 3.4          | 29.4        | 6.0         | 20.2        | 2.7         | 67.2        | 6.2         | 42.0        | 36.8        | 25.8        |                            |                 |                 |
|                                 | Sudan                    | 34,385,963         | 3,298           | 16.3       | 38.2        | 3.0         | 4.3          | 16.7        | 8.9         | 8.0         | 7.9         | 37.3        | 11.1        | 20.5        | 57.2        | 30.7        |                            | HI              | HI              |
|                                 | Swaziland                | 1,202,843          | 7,149           | 2.0        | 25.5        | 9.0         | 1.9          | 25.0        | 6.2         | 8.3         | 4.9         | 54.3        | 9.4         | 23.1        | 42.0        | 27.2        |                            |                 |                 |
|                                 | Tanzania                 | 46,098,591         | 2,048           | 3.5        | 31.8        | 2.8         | 4.1          | 16.1        | 9.0         | 7.5         | 9.6         | 36.7        | 11.9        | 20.4        | 55.2        | 37.2        |                            | HI              | HI              |
|                                 | Togo                     | 6,502,952          | 1,184           | 5.7        | 23.8        | 1.5         | 2.8          | 14.0        | 9.9         | 6.5         | 8.6         | 37.0        | 10.3        | 20.4        | 71.0        | 48.9        |                            |                 |                 |
|                                 | Uganda                   | 33,915,133         | 1,485           | 3.5        | 28.9        | 3.7         | 2.9          | 16.0        | 8.1         | 4.5         | 9.9         | 31.9        | 11.9        | 14.3        | 51.1        | 28.5        |                            |                 |                 |
|                                 | Zambia                   | 13,850,033         | 3,213           | 4.2        | 34.6        | 5.2         | 3.7          | 16.7        | 8.6         | 8.4         | 8.5         | 37.6        | 13.3        | 19.8        | 54.2        | 33.7        |                            | HI              | HI              |
|                                 | Zimbabwe                 | 14,086,317         | 1,445           | 2.9        | 23.5        | 2.5         | 1.9          | 22.3        | 9.1         | 6.5         | 4.6         | 54.5        | 10.7        | 23.1        | 41.7        | 28.8        |                            |                 |                 |
| <b>Region Total: South Asia</b> |                          | <b>866,955,944</b> |                 | <b>6.6</b> | <b>33.7</b> | <b>3.7</b>  | <b>5.2</b>   | <b>15.0</b> | <b>10.2</b> | <b>7.3</b>  | <b>9.7</b>  | <b>37.6</b> | <b>12.3</b> | <b>20.9</b> | <b>58.9</b> | <b>39.2</b> | <b>1</b>                   | <b>19</b>       | <b>21</b>       |

Data sources: UNICEF-WHO-The World Bank, 2017; NCD-RisC; and Stevens et al., 2013 supplemented for missing preschooler data with DHS measures

\* GDP per capita based on PPP (current international \$) from World Bank Indicators

\*\* Double Burden of Malnutrition (DBM) is based on prevalence of stunting exceeding threshold and prevalence of adult overweight exceeding threshold

**Supplemental Table S3. Number of households with children and women, mean age for women, and GDP per capita (PPP) by country for earliest and latest survey years\***

| Region                        | Country               | Earliest Year | Households N (#) Earliest Year  |                                |                                    |                    |                      | Latest Year | Households N (#) Latest Year    |                                |                                    |                    |                      |
|-------------------------------|-----------------------|---------------|---------------------------------|--------------------------------|------------------------------------|--------------------|----------------------|-------------|---------------------------------|--------------------------------|------------------------------------|--------------------|----------------------|
|                               |                       |               | Households with Children (0-4y) | Households with Women (15-49y) | Households with Children and Women | Mean age for women | 1990 GDP (PPP units) |             | Households with Children (0-4y) | Households with Women (15-49y) | Households with Children and Women | Mean age for women | 2010 GDP (PPP units) |
| East Asia and Pacific         | Cambodia              | 2000          | 2762                            | 5045                           | 2454                               | 29.95              | 265.81               | 2014        | 3614                            | 7973                           | 3426                               | 30.53              | 795.17               |
|                               | China                 | 1991          | 859                             | 2395                           | 739                                | 35.16              | 314.43               | 2015        | 794                             | 3120                           | 555                                | 38.74              | 4432.96              |
|                               | Indonesia             | 1993          | 2170                            | 4551                           | 1826                               | 32.96              | 620.72               | 2014        | 4721                            | 9059                           | 2962                               | 31.71              | 2951.70              |
|                               | Myanmar               |               |                                 |                                |                                    |                    |                      | 2015        | 3410                            | 8929                           | 3242                               | 31.81              | 3534.80              |
|                               | Timor-Leste           |               |                                 |                                |                                    |                    | 425.49               | 2009        | 5263                            | 8503                           | 4793                               | 28.91              | 765.95               |
|                               | Vietnam               | 1992          | 2047                            | 2101                           | 753                                | 27.37              | 98.03                | 2002        | 9238                            | 27221                          | 6655                               | 31.35              | 1224.31              |
| Europe and Central Asia       | Albania               |               |                                 |                                |                                    |                    | 638.89               | 2008        | 1262                            | 5424                           | 1217                               | 31.80              | 3700.74              |
|                               | Armenia               | 2000          | 1157                            | 4237                           | 1098                               | 31.42              | 636.68               | 2015        | 1272                            | 4420                           | 1223                               | 31.66              | 3030.71              |
|                               | Azerbaijan            |               |                                 |                                |                                    |                    | 1237.32              | 2006        | 1532                            | 5519                           | 1444                               | 31.30              | 5843.17              |
|                               | Kazakhstan            | 1995          | 647                             | 2723                           | 618                                | 30.68              | 1647.46              | 1999        | 463                             | 1744                           | 448                                | 31.25              | 9070.01              |
|                               | Kyrgyz Republic       | 1997          | 842                             | 2625                           | 802                                | 29.85              | 608.95               | 2012        | 2860                            | 5663                           | 2632                               | 29.95              | 880.04               |
|                               | Moldova               |               |                                 |                                |                                    |                    | 972.09               | 2005        | 1225                            | 5628                           | 1182                               | 31.34              | 1631.53              |
|                               | Tajikistan            |               |                                 |                                |                                    |                    | 496.00               | 2012        | 244                             | 5485                           | 229                                | 29.23              | 740.00               |
|                               | Turkey                | 1993          | 2412                            | 2330                           | 2198                               | 27.93              | 2783.59              | 2003        | 2990                            | 2927                           | 2767                               | 28.62              | 10049.77             |
| Uzbekistan                    | 1996                  | 920           | 2900                            | 873                            | 28.91                              | 651.42             |                      |             |                                 |                                |                                    | 1377.08            |                      |
| Latin America & the Caribbean | Bolivia               | 1994          | 2547                            | 2273                           | 2149                               | 28.64              | 731.04               | 2008        | 5880                            | 12299                          | 5488                               | 29.66              | 1978.85              |
|                               | Brazil                | 1996          | 3189                            | 3122                           | 2911                               | 28.21              | 3086.88              | 2013        |                                 | 21645                          |                                    | 35.29              | 10992.94             |
|                               | Colombia              | 1995          | 3347                            | 3173                           | 3055                               | 28.33              | 1212.96              | 2010        | 12840                           | 34233                          | 12050                              | 29.65              | 6186.02              |
|                               | Dominican Republic    | 1991          | 2235                            | 2066                           | 1907                               | 27.63              | 983.18               | 2013        | 2581                            | 6685                           | 2421                               | 30.24              | 5195.38              |
|                               | Guatemala             | 1995          | 5370                            | 4771                           | 4631                               | 28.90              | 857.34               | 2014        | 8664                            | 16459                          | 8151                               | 28.89              | 2873.08              |
|                               | Guyana                |               |                                 |                                |                                    |                    | 547.06               | 2009        | 1272                            | 3438                           | 1174                               | 30.65              | 2994.45              |
|                               | Haiti                 | 1994          | 1861                            | 1762                           | 1610                               | 30.10              | 477.94               | 2017        | 4250                            | 6043                           | 2688                               | 28.56              | 663.91               |
|                               | Honduras              | 2005          | 6940                            | 13335                          | 6492                               | 28.71              | 623.58               | 2011        | 7787                            | 15370                          | 7419                               | 28.96              | 2018.75              |
|                               | Mexico                | 1988          | 5022                            | 9786                           | 4530                               | 28.74              | 3116.12              | 2012        | 10658                           | 13690                          | 4382                               | 34.04              | 9127.54              |
|                               | Nicaragua             | 1998          | 4797                            | 8536                           | 4486                               | 28.50              | 244.97               | 2001        | 4313                            | 8451                           | 4056                               | 28.75              | 1455.84              |
|                               | Peru                  | 1992          | 5454                            | 4967                           | 4770                               | 29.50              | 1212.53              | 2012        | 7531                            | 17314                          | 7242                               | 30.79              | 5283.22              |
| Middle East and North Africa  | Egypt, Arab Rep.      | 1992          | 4905                            | 4494                           | 4397                               | 29.87              | 758.76               | 2014        | 10958                           | 18432                          | 9872                               | 33.75              | 2698.37              |
|                               | Jordan                | 1997          | 3389                            | 2996                           | 2840                               | 30.76              | 1268.22              | 2012        | 4204                            | 6212                           | 3732                               | 35.09              | 4370.00              |
|                               | Morocco               | 1992          | 3021                            | 2705                           | 2639                               | 31.49              | 1032.75              | 2003        | 4233                            | 9595                           | 4007                               | 29.79              | 2795.49              |
|                               | Yemen, Rep.           |               |                                 |                                |                                    |                    | 472.64               | 2013        | 8874                            | 13836                          | 7964                               | 27.19              | 1290.62              |
| South Asia                    | Bangladesh            | 1996          | 3887                            | 3862                           | 3555                               | 25.79              | 286.24               | 2014        | 6048                            | 14235                          | 5814                               | 31.36              | 674.93               |
|                               | India                 | 1998          | 23147                           | 66015                          | 21535                              | 31.63              | 373.79               | 2015        | 171135                          | 463872                         | 160623                             | 30.24              | 1375.38              |
|                               | Maldives              |               |                                 |                                |                                    |                    | 980.02               | 2009        | 1897                            | 4031                           | 1782                               | 33.24              | 6570.43              |
|                               | Nepal                 | 1996          | 3200                            | 3169                           | 2929                               | 26.99              | 190.11               | 2016        | 1825                            | 4373                           | 1749                               | 29.50              | 534.52               |
| Sub-Saharan Africa            | Burkina Faso          | 1992          | 2728                            | 2766                           | 2490                               | 29.44              | 332.62               | 2010        | 4149                            | 5197                           | 3809                               | 28.90              | 535.89               |
|                               | Burundi               |               |                                 |                                |                                    |                    | 202.10               | 2010        | 2294                            | 2975                           | 1972                               | 27.71              | 241.79               |
|                               | Cameroon              | 1998          | 1479                            | 1447                           | 1327                               | 26.92              | 915.50               | 2011        | 3177                            | 4700                           | 2890                               | 27.98              | 1144.25              |
|                               | Central African Rep.  | 1994          | 1915                            | 1806                           | 1690                               | 27.16              | 506.86               |             |                                 |                                |                                    |                    | 451.26               |
|                               | Chad                  | 1996          | 3546                            | 3231                           | 3033                               | 27.82              | 289.23               | 2014        | 6276                            | 7634                           | 5336                               | 28.45              | 760.71               |
|                               | Comoros               | 1996          | 827                             | 767                            | 725                                | 29.48              | 571.01               | 2012        | 1771                            | 3286                           | 1595                               | 27.69              | 739.51               |
|                               | Congo, Dem. Rep.      | 2007          | 2307                            | 3061                           | 2026                               | 28.80              | 256.82               | 2013        | 5052                            | 6099                           | 4346                               | 28.46              | 198.71               |
|                               | Congo, Rep.           | 2005          | 2826                            | 4233                           | 2618                               | 28.05              | 1171.56              | 2011        | 2982                            | 3839                           | 2718                               | 28.74              | 2970.12              |
|                               | Cote d'Ivoire         | 1994          | 2500                            | 2441                           | 2304                               | 27.28              | 862.44               | 2011        | 2103                            | 2901                           | 1898                               | 28.48              | 1161.26              |
|                               | Ethiopia              | 2000          | 6372                            | 10258                          | 5721                               | 28.14              | 249.98               | 2016        | 6402                            | 10940                          | 5764                               | 28.28              | 320.38               |
|                               | Gabon                 | 2000          | 2095                            | 2034                           | 1893                               | 27.11              | 6406.90              | 2012        | 2191                            | 3428                           | 1976                               | 28.94              | 8767.83              |
|                               | Gambia                |               |                                 |                                |                                    |                    | 900.00               | 2013        | 1631                            | 2111                           | 1525                               | 27.46              | 1610.00              |
|                               | Ghana                 | 1993          | 1735                            | 1681                           | 1601                               | 28.75              | 398.09               | 2014        | 1985                            | 3457                           | 1803                               | 29.92              | 1319.08              |
|                               | Guinea                | 1999          | 2844                            | 2698                           | 2572                               | 28.99              | 463.00               | 2012        | 2014                            | 2710                           | 1853                               | 28.37              | 474.47               |
|                               | Kenya                 | 1993          | 3290                            | 3136                           | 2900                               | 28.68              | 365.60               | 2014        | 13570                           | 10783                          | 6020                               | 29.00              | 794.77               |
|                               | Lesotho               | 2004          | 1137                            | 2435                           | 1076                               | 28.59              | 329.91               | 2014        | 1102                            | 2590                           | 1076                               | 28.53              | 1003.70              |
|                               | Liberia               | 2007          | 3103                            | 4519                           | 2766                               | 29.69              | 180.72               | 2013        | 2177                            | 3143                           | 2020                               | 28.79              | 323.65               |
|                               | Madagascar            | 1997          | 2670                            | 2518                           | 2352                               | 27.57              | 273.17               | 2003        | 3290                            | 5778                           | 2975                               | 29.75              | 426.63               |
|                               | Malawi                | 1992          | 2296                            | 2216                           | 1976                               | 29.07              | 200.49               | 2015        | 4128                            | 6041                           | 3830                               | 28.33              | 362.30               |
|                               | Mali                  | 1995          | 4035                            | 3819                           | 3572                               | 28.30              | 279.17               | 2013        | 2882                            | 3536                           | 2537                               | 29.04              | 613.04               |
|                               | Mozambique            | 1997          | 3092                            | 3025                           | 2827                               | 27.31              | 181.83               | 2011        | 6595                            | 9416                           | 5927                               | 28.90              | 393.72               |
|                               | Namibia               | 1992          | 1647                            | 1764                           | 1520                               | 29.08              | 1661.19              | 2013        | 1379                            | 3255                           | 1322                               | 33.20              | 4875.97              |
|                               | Niger                 | 1992          | 2877                            | 2775                           | 2537                               | 27.96              | 318.52               | 2012        | 2916                            | 3381                           | 2552                               | 29.10              | 348.80               |
|                               | Nigeria               | 2003          | 2987                            | 4660                           | 2654                               | 28.09              | 291.87               | 2013        | 16545                           | 24707                          | 14581                              | 29.04              | 1443.21              |
|                               | Rwanda                | 2000          | 4368                            | 6676                           | 3876                               | 28.22              | 358.70               | 2014        | 2764                            | 4602                           | 2554                               | 28.71              | 529.41               |
|                               | Sao Tome and Principe |               |                                 |                                |                                    |                    | 660.62               | 2008        | 1239                            | 1766                           | 1081                               | 29.29              | 1215.49              |
|                               | Senegal               | 1992          | 2195                            | 2035                           | 1965                               | 29.32              | 789.42               | 2010        | 1878                            | 2384                           | 1771                               | 28.02              | 1033.91              |
|                               | Sierra Leone          | 2008          | 1597                            | 2484                           | 1461                               | 29.60              | 163.16               | 2013        | 3212                            | 4800                           | 3002                               | 28.83              | 325.48               |
|                               | Swaziland             |               |                                 |                                |                                    |                    | 1292.06              | 2006        | 1489                            | 3037                           | 1423                               | 27.92              | 3503.16              |
|                               | Tanzania              | 1991          | 4124                            | 3886                           | 3641                               | 28.59              | 171.91               | 2015        | 5979                            | 8753                           | 5527                               | 28.91              | 526.56               |
|                               | Togo                  | 1998          | 2964                            | 2845                           | 2731                               | 29.18              | 444.26               | 2013        | 2156                            | 3136                           | 1964                               | 29.47              | 529.65               |
|                               | Uganda                | 1995          | 3368                            | 3033                           | 2844                               | 27.21              | 243.19               | 2016        | 3006                            | 4205                           | 2701                               | 28.21              | 514.51               |
| Zambia                        | 1992                  | 3165          | 2914                            | 2724                           | 27.86                              | 418.37             | 2014                 | 8123        | 11114                           | 7446                           | 28.48                              | 1252.49            |                      |
| Zimbabwe                      | 1994                  | 1865          | 1839                            | 1711                           | 27.51                              | 839.01             | 2015                 | 3933        | 6931                            | 3734                           | 28.63                              | 591.29             |                      |

\* All data are from the Demographic and Health Surveys (DHS, <https://dhsprogram.com/>) with the exceptions of China (China Health and Nutrition Survey), Indonesia (Indonesian Family Life Survey), Mexico (Mexico's National Survey of Health and Nutrition), Brazil (Brazilian National Health Survey), and Vietnam (Vietnam Living Standards Survey).

**Supplemental Table S4. Prevalence\* of wasting, stunting, and overweight or obesity for children (ages 0–4 years) and annualized change in prevalence from earliest to latest survey years\*\***

| Region                        | Country              | Wasting prevalence |             |                   | Stunting prevalence |             |                   | Wasting or stunting prevalence |             |                   | Overweight or Obese |             |                   |
|-------------------------------|----------------------|--------------------|-------------|-------------------|---------------------|-------------|-------------------|--------------------------------|-------------|-------------------|---------------------|-------------|-------------------|
|                               |                      | Earliest year      | Latest year | Annualized change | Earliest year       | Latest year | Annualized change | Earliest year                  | Latest year | Annualized change | Earliest year       | Latest year | Annualized change |
| East Asia & Pacific           | Cambodia             | 23.75              | 12.85       | -0.78             | 55.34               | 36.63       | -1.34             | 68.72                          | 44.06       | -1.76             | 6.43                | 3.24        | -0.23             |
|                               | China                | 2.94               | 4.57        | 0.07              | 36.67               | 17.13       | -0.81             | 38.43                          | 21.90       | -0.69             | 9.28                | 23.39       | 0.59              |
|                               | Indonesia            | 12.69              | 9.92        | -0.13             | 51.87               | 35.69       | -0.77             | 59.13                          | 42.49       | -0.79             | 4.35                | 9.03        | 0.22              |
|                               | Myanmar              |                    | 8.50        |                   |                     | 32.30       |                   |                                | 38.08       |                   |                     | 2.18        |                   |
|                               | Timor-Leste          |                    | 27.07       |                   |                     | 68.91       |                   |                                | 80.52       |                   |                     | 10.37       |                   |
|                               | Vietnam              | 8.65               | 9.39        | 0.07              | 67.56               | 33.66       | -3.39             | 70.10                          | 39.44       | -3.07             | 4.01                | 2.23        | -0.18             |
|                               | Albania              |                    | 12.09       |                   |                     | 27.09       |                   |                                | 38.25       |                   |                     | 29.23       |                   |
|                               | Armenia              | 3.29               | 5.62        | 0.16              | 20.02               | 11.88       | -0.54             | 23.00                          | 17.14       | -0.39             | 20.30               | 17.17       | -0.21             |
|                               | Azerbaijan           |                    | 9.44        |                   |                     | 33.22       |                   |                                | 40.22       |                   |                     | 19.97       |                   |
| Eastern Europe & Central Asia | Kyrgyz Republic      | 4.56               | 4.10        | -0.03             | 36.11               | 22.33       | -0.92             | 39.21                          | 25.38       | -0.92             | 11.30               | 12.31       | 0.07              |
|                               | Moldova              |                    | 7.43        |                   |                     | 11.88       |                   |                                | 18.59       |                   |                     | 11.11       |                   |
|                               | Tajikistan           |                    | 18.96       |                   |                     | 39.62       |                   |                                | 51.60       |                   |                     | 10.09       |                   |
|                               | Turkey               | 5.50               | 1.40        | -0.41             | 27.49               | 17.21       | -1.03             | 30.51                          | 18.21       | -1.23             | 6.96                | 11.46       | 0.45              |
|                               | Uzbekistan           | 15.53              |             |                   | 42.80               |             |                   | 54.43                          |             |                   | 26.07               |             |                   |
| Latin America & the Caribbean | Bolivia              | 6.82               | 2.24        | -0.33             | 37.90               | 30.80       | -0.51             | 41.68                          | 32.16       | -0.68             | 9.74                | 11.79       | 0.15              |
|                               | Brazil               | 4.05               |             |                   | 15.13               |             |                   | 18.28                          |             |                   | 8.00                |             |                   |
|                               | Colombia             | 2.44               | 1.24        | -0.08             | 22.93               | 13.87       | -0.60             | 24.38                          | 14.79       | -0.64             | 6.24                | 6.01        | -0.02             |
|                               | Dominican Rep.       | 3.60               | 2.97        | -0.03             | 25.09               | 8.68        | -0.75             | 27.21                          | 11.14       | -0.73             | 7.25                | 10.10       | 0.13              |
|                               | Guatemala            | 6.73               | 1.08        | -0.30             | 63.06               | 49.67       | -0.70             | 64.95                          | 50.01       | -0.79             | 10.11               | 6.82        | -0.17             |
|                               | Guyana               |                    | 7.54        |                   |                     | 25.09       |                   |                                | 31.06       |                   |                     | 13.43       |                   |
|                               | Haiti                | 14.39              | 5.33        | -0.39             | 47.33               | 24.90       | -0.98             | 53.03                          | 28.54       | -1.06             | 7.79                | 4.99        | -0.12             |
|                               | Honduras             | 2.26               | 1.75        | -0.09             | 32.45               | 24.79       | -1.28             | 34.04                          | 25.81       | -1.37             | 7.97                | 6.92        | -0.17             |
|                               | Mexico               | 8.65               | 1.60        | -0.29             | 30.92               | 13.79       | -0.71             | 36.77                          | 15.24       | -0.90             | 9.21                | 9.13        | 0.00              |
|                               | Nicaragua            | 5.10               | 3.36        | -0.58             | 35.92               | 29.59       | -2.11             | 38.91                          | 31.61       | -2.43             | 11.40               | 10.93       | -0.15             |
| Middle East & North Africa    | Peru                 | 3.12               | 0.84        | -0.11             | 42.74               | 19.66       | -1.15             | 44.34                          | 20.15       | -1.21             | 13.57               | 8.75        | -0.24             |
|                               | Egypt, Arab Rep.     | 6.55               | 13.54       | 0.32              | 40.45               | 27.52       | -0.59             | 44.50                          | 39.38       | -0.23             | 21.81               | 21.46       | -0.02             |
|                               | Jordan               | 3.92               | 4.03        | 0.01              | 16.29               | 10.78       | -0.37             | 19.09                          | 14.26       | -0.32             | 7.45                | 7.13        | -0.02             |
|                               | Morocco              | 4.45               | 14.53       | 0.92              | 38.73               | 27.53       | -1.02             | 40.76                          | 39.52       | -0.11             | 16.61               | 17.95       | 0.12              |
|                               | Yemen, Rep.          |                    |             |                   |                     |             |                   |                                |             |                   |                     |             |                   |
| South Asia                    | Bangladesh           | 27.92              | 17.45       | -0.58             | 66.76               | 40.03       | -1.49             | 76.45                          | 49.82       | -1.48             | 3.64                | 2.38        | -0.07             |
|                               | India                | 23.93              | 27.93       | 0.24              | 57.18               | 44.40       | -0.75             | 67.75                          | 60.57       | -0.42             | 5.50                | 3.77        | -0.10             |
|                               | Maldives             |                    | 14.85       |                   |                     | 23.08       |                   |                                | 33.90       |                   |                     | 8.62        |                   |
|                               | Nepal                | 17.89              | 12.75       | -0.26             | 62.02               | 40.76       | -1.06             | 67.81                          | 47.65       | -1.01             | 1.24                | 1.62        | 0.02              |
| Sub-Saharan Africa            | Burkina Faso         | 25.28              | 24.50       | -0.04             | 54.56               | 45.55       | -0.50             | 64.27                          | 56.96       | -0.41             | 5.67                | 4.90        | -0.04             |
|                               | Burundi              |                    | 8.96        |                   |                     | 67.65       |                   |                                | 69.95       |                   |                     | 4.39        |                   |
|                               | Cameroon             | 10.93              | 9.67        | -0.10             | 43.52               | 42.57       | -0.07             | 49.29                          | 46.50       | -0.21             | 10.80               | 10.91       | 0.01              |
|                               | Central African Rep. | 12.32              |             |                   | 46.84               |             |                   | 52.69                          |             |                   | 5.74                |             |                   |
|                               | Chad                 | 25.49              | 21.75       | -0.21             | 59.66               | 53.93       | -0.32             | 68.97                          | 62.76       | -0.34             | 4.96                | 4.99        | 0.00              |
|                               | Comoros              | 13.96              | 19.09       | 0.32              | 43.65               | 39.18       | -0.28             | 50.30                          | 52.13       | 0.11              | 7.04                | 16.97       | 0.62              |
|                               | Congo, Dem. Rep.     | 16.01              | 13.90       | -0.35             | 58.63               | 55.23       | -0.57             | 66.60                          | 61.75       | -0.81             | 15.61               | 8.52        | -1.18             |
|                               | Congo, Rep.          | 11.61              | 8.01        | -0.60             | 37.44               | 29.30       | -1.36             | 45.24                          | 34.82       | -1.74             | 12.23               | 5.11        | -1.19             |
|                               | Cote d'Ivoire        | 15.39              | 12.91       | -0.15             | 38.50               | 38.62       | 0.01              | 45.90                          | 47.13       | 0.07              | 4.09                | 4.97        | 0.05              |
|                               | Ethiopia             | 18.38              | 14.03       | -0.27             | 67.58               | 47.57       | -1.25             | 72.78                          | 54.66       | -1.13             | 3.17                | 4.74        | 0.10              |
|                               | Gabon                | 7.20               | 5.96        | -0.10             | 35.42               | 22.30       | -1.09             | 39.39                          | 25.84       | -1.13             | 9.60                | 12.69       | 0.26              |
|                               | Gambia               |                    | 22.94       |                   |                     | 38.04       |                   |                                | 51.16       |                   |                     | 8.52        |                   |
|                               | Ghana                | 17.19              | 6.85        | -0.49             | 36.48               | 22.04       | -0.69             | 45.82                          | 26.40       | -0.92             | 3.88                | 3.90        | 0.00              |
|                               | Guinea               | 16.89              | 16.63       | -0.02             | 47.49               | 39.96       | -0.58             | 55.82                          | 49.23       | -0.51             | 8.40                | 7.33        | -0.08             |
|                               | Kenya                | 10.90              | 5.70        | -0.25             | 50.24               | 30.92       | -0.92             | 54.34                          | 34.24       | -0.96             | 9.58                | 6.03        | -0.17             |
|                               | Lesotho              | 7.92               | 4.37        | -0.36             | 49.14               | 35.81       | -1.33             | 54.16                          | 38.63       | -1.55             | 11.06               | 10.70       | -0.04             |
|                               | Liberia              | 11.48              | 9.07        | -0.40             | 47.06               | 39.53       | -1.25             | 53.21                          | 44.36       | -1.48             | 7.11                | 5.86        | -0.21             |
|                               | Madagascar           | 12.20              | 21.74       | 1.59              | 59.99               | 61.79       | 0.30              | 63.57                          | 71.87       | 1.38              | 3.85                | 10.43       | 1.10              |
|                               | Malawi               | 10.24              | 3.96        | -0.27             | 66.69               | 42.03       | -1.07             | 69.70                          | 44.56       | -1.09             | 14.85               | 6.35        | -0.37             |
|                               | Mali                 | 34.68              | 20.58       | -0.78             | 42.39               | 49.71       | 0.41              | 62.03                          | 60.21       | -0.10             | 3.00                | 5.62        | 0.15              |
| Mozambique                    | 14.93                | 9.47               | -0.39       | 49.27             | 54.04               | 0.34        | 56.86             | 59.16                          | 0.16        | 7.92              | 12.76               | 0.35        |                   |
| Namibia                       | 15.53                | 12.19              | -0.16       | 45.11             | 25.71               | -0.92       | 52.07             | 34.23                          | -0.85       | 8.50              | 6.50                | -0.10       |                   |
| Niger                         | 30.38                | 30.47              | 0.00        | 62.30             | 59.14               | -0.16       | 71.85             | 70.46                          | -0.07       | 3.69              | 6.11                | 0.12        |                   |
| Nigeria                       | 19.03                | 27.94              | 0.89        | 54.52             | 47.46               | -0.71       | 63.00             | 62.02                          | -0.10       | 11.84             | 8.75                | -0.31       |                   |

(Continued next page...)



| Region                            | Country               | Wasting prevalence |             |                   | Stunting prevalence |             |                   | Wasting or stunting prevalence |             |                   | Overweight or Obese |             |                   |
|-----------------------------------|-----------------------|--------------------|-------------|-------------------|---------------------|-------------|-------------------|--------------------------------|-------------|-------------------|---------------------|-------------|-------------------|
|                                   |                       | Earliest year      | Latest year | Annualized change | Earliest year       | Latest year | Annualized change | Earliest year                  | Latest year | Annualized change | Earliest year       | Latest year | Annualized change |
| Sub-Saharan Africa<br>(continued) | Rwanda                | 13.01              | 3.24        | -0.70             | 57.23               | 44.73       | -0.89             | 64.62                          | 46.59       | -1.29             | 10.34               | 11.45       | 0.08              |
|                                   | Sao Tome and Principe |                    | 16.62       |                   |                     | 36.84       |                   |                                | 50.42       |                   |                     | 18.26       |                   |
|                                   | Senegal               | 18.29              | 19.70       | 0.08              | 50.57               | 44.03       | -0.36             | 56.91                          | 53.62       | -0.18             | 9.58                | 7.43        | -0.12             |
|                                   | Sierra Leone          | 15.98              | 15.33       | -0.13             | 46.05               | 48.82       | 0.55              | 55.93                          | 57.26       | 0.26              | 17.42               | 15.42       | -0.40             |
|                                   | Swaziland             |                    | 4.54        |                   |                     | 34.62       |                   |                                | 38.06       |                   |                     | 15.86       |                   |
|                                   | Tanzania              | 13.25              | 7.44        | -0.24             | 61.22               | 42.54       | -0.78             | 66.86                          | 46.20       | -0.86             | 9.64                | 5.95        | -0.15             |
|                                   | Togo                  | 18.14              | 9.90        | -0.55             | 34.70               | 32.92       | -0.12             | 45.49                          | 37.93       | -0.50             | 3.89                | 3.23        | -0.04             |
|                                   | Uganda                | 10.14              | 6.16        | -0.19             | 55.53               | 35.41       | -0.96             | 58.78                          | 39.00       | -0.94             | 8.10                | 6.11        | -0.09             |
|                                   | Zambia                | 10.57              | 9.41        | -0.05             | 57.97               | 49.02       | -0.41             | 62.04                          | 55.08       | -0.32             | 7.91                | 9.85        | 0.09              |
|                                   | Zimbabwe              | 7.88               | 4.90        | -0.14             | 32.12               | 31.03       | -0.05             | 37.54                          | 34.39       | -0.15             | 9.09                | 8.38        | -0.03             |

\* Nationally representative and regionally weighted

\*\* All data are from the Demographic and Health Surveys (DHS, <https://dhsprogram.com/>) with the exceptions of China (China Health and Nutrition Survey), Indonesia (Indonesian Family Life Survey), Mexico (Mexico's National Survey of Health and Nutrition), Brazil (Brazilian National Health Survey), and Vietnam (Vietnam Living Standards Survey).

**Supplemental Table S5. Prevalence\* of thinness and overweight for women (ages 15–49 years) and annualized change in prevalence from earliest to latest survey years\*\***

| Region                        | Country                    | Earliest survey year | Latest survey year | Thinness prevalence |             |                   | Overweight prevalence |             |                   |
|-------------------------------|----------------------------|----------------------|--------------------|---------------------|-------------|-------------------|-----------------------|-------------|-------------------|
|                               |                            |                      |                    | Earliest year       | Latest year | Annualized change | Earliest year         | Latest year | Annualized change |
| East Asia & Pacific           | Cambodia                   | 2000                 | 2014               | 23.84               | 16.42       | -0.53             | 7.49                  | 21.13       | 0.97              |
|                               | China                      | 1991                 | 2015               | 7.30                | 10.97       | 0.15              | 10.76                 | 25.78       | 0.63              |
|                               | Indonesia                  | 1993                 | 2014               | 16.11               | 10.93       | -0.25             | 15.24                 | 40.57       | 1.21              |
|                               | Myanmar                    |                      | 2015               |                     | 18.85       |                   |                       | 27.46       |                   |
|                               | Timor-Leste                |                      | 2009               |                     | 30.19       |                   |                       | 6.75        |                   |
|                               | Vietnam                    | 1992                 | 2002               | 34.93               | 32.73       | -0.22             | 2.32                  | 5.39        | 0.31              |
| Eastern Europe & Central Asia | Albania                    |                      | 2008               |                     | 3.84        |                   |                       | 44.22       |                   |
|                               | Armenia                    | 2000                 | 2015               | 4.46                | 3.42        | -0.07             | 48.70                 | 47.73       | -0.06             |
|                               | Azerbaijan                 |                      | 2006               |                     | 5.92        |                   |                       | 54.75       |                   |
|                               | Kazakhstan                 | 1995                 | 1999               | 8.14                | 8.61        | 0.12              | 42.17                 | 35.64       | -1.63             |
|                               | Kyrgyz Republic            | 1997                 | 2012               | 6.74                | 7.75        | 0.07              | 34.44                 | 44.12       | 0.65              |
|                               | Moldova                    |                      | 2005               |                     | 6.33        |                   |                       | 45.78       |                   |
|                               | Tajikistan                 |                      | 2012               |                     | 13.42       |                   |                       | 40.51       |                   |
|                               | Turkey                     | 1993                 | 2003               | 2.19                | 2.43        | 0.02              | 50.83                 | 58.91       | 0.81              |
|                               | Uzbekistan                 | 1996                 |                    | 11.71               |             |                   | 27.38                 |             |                   |
| Latin America & the Caribbean | Bolivia                    | 1994                 | 2008               | 2.38                | 2.03        | -0.02             | 33.59                 | 56.28       | 1.62              |
|                               | Brazil                     | 1996                 | 2013               | 7.29                | 3.95        | -0.20             | 35.90                 | 48.73       | 0.75              |
|                               | Colombia                   | 1995                 | 2010               | 3.88                | 5.58        | 0.11              | 45.63                 | 53.42       | 0.52              |
|                               | Dominican Republic         | 1991                 | 2013               | 8.21                | 7.91        | -0.01             | 23.37                 | 57.15       | 1.54              |
|                               | Guatemala                  | 1995                 | 2014               | 3.62                | 2.92        | -0.04             | 34.28                 | 62.26       | 1.47              |
|                               | Guyana                     |                      | 2009               |                     | 11.94       |                   |                       | 53.27       |                   |
|                               | Haiti                      | 1994                 | 2017               | 22.01               | 12.55       | -0.41             | 11.33                 | 39.37       | 1.22              |
|                               | Honduras                   | 2005                 | 2011               | 4.35                | 4.91        | 0.09              | 54.78                 | 60.25       | 0.91              |
|                               | Mexico                     | 1988                 | 2012               | 14.25               | 1.78        | -0.52             | 36.24                 | 69.71       | 1.39              |
|                               | Nicaragua                  | 1998                 | 2001               | 4.52                | 3.82        | -0.24             | 52.99                 | 57.89       | 1.63              |
|                               | Peru                       | 1992                 | 2012               | 1.34                | 1.98        | 0.03              | 40.05                 | 60.22       | 1.01              |
|                               | Middle East & North Africa | Egypt, Arab Rep.     | 1992               | 2014                | 1.75        | 0.22              | -0.07                 | 56.07       | 79.64             |
| Jordan                        |                            | 1997                 | 2012               | 2.04                | 2.84        | 0.05              | 62.73                 | 63.17       | 0.03              |
| Morocco                       |                            | 1992                 | 2003               | 3.79                | 8.72        | 0.45              | 32.53                 | 48.14       | 1.42              |
| Yemen, Rep.                   |                            |                      | 2013               |                     | 28.76       |                   |                       | 31.82       |                   |
| South Asia                    | Bangladesh                 | 1996                 | 2014               | 53.48               | 21.67       | -1.77             | 2.94                  | 23.63       | 1.15              |
|                               | India                      | 1998                 | 2015               | 39.76               | 26.86       | -0.76             | 10.90                 | 23.93       | 0.77              |
|                               | Maldives                   |                      | 2009               |                     | 12.81       |                   |                       | 47.94       |                   |
|                               | Nepal                      | 1996                 | 2016               | 30.41               | 19.49       | -0.55             | 1.68                  | 26.84       | 1.26              |
| Sub-Saharan Africa            | Burkina Faso               | 1992                 | 2010               | 18.28               | 18.96       | 0.04              | 8.07                  | 13.58       | 0.31              |
|                               | Burundi                    |                      | 2010               |                     | 19.54       |                   |                       | 8.42        |                   |
|                               | Cameroon                   | 1998                 | 2011               | 7.23                | 8.20        | 0.07              | 21.89                 | 40.27       | 1.41              |
|                               | Central African Republic   | 1994                 |                    | 16.79               |             |                   | 6.98                  |             |                   |
|                               | Chad                       | 1996                 | 2014               | 22.42               | 20.63       | -0.10             | 5.90                  | 13.99       | 0.45              |
|                               | Comoros                    | 1996                 | 2012               | 8.59                | 8.08        | -0.03             | 19.05                 | 46.03       | 1.69              |
|                               | Congo, Dem. Rep.           | 2007                 | 2013               | 21.15               | 15.17       | -1.00             | 14.51                 | 18.66       | 0.69              |
|                               | Congo, Rep.                | 2005                 | 2011               | 13.65               | 15.53       | 0.31              | 33.88                 | 30.60       | -0.55             |
|                               | Cote d'Ivoire              | 1994                 | 2011               | 10.60               | 9.12        | -0.09             | 16.32                 | 31.40       | 0.89              |
|                               | Ethiopia                   | 2000                 | 2016               | 33.33               | 23.94       | -0.59             | 3.61                  | 8.17        | 0.28              |
|                               | Gabon                      | 2000                 | 2012               | 7.83                | 7.39        | -0.04             | 33.22                 | 53.11       | 1.66              |
|                               | Gambia                     |                      | 2013               |                     | 23.01       |                   |                       | 34.56       |                   |
|                               | Ghana                      | 1993                 | 2014               | 13.00               | 5.99        | -0.33             | 13.03                 | 43.85       | 1.47              |
|                               | Guinea                     | 1999                 | 2012               | 13.30               | 16.22       | 0.22              | 13.98                 | 24.33       | 0.80              |
|                               | Kenya                      | 1993                 | 2014               | 10.64               | 9.79        | -0.04             | 14.75                 | 37.69       | 1.09              |
|                               | Lesotho                    | 2004                 | 2014               | 6.35                | 3.95        | -0.24             | 49.55                 | 52.51       | 0.30              |
|                               | Liberia                    | 2007                 | 2013               | 11.93               | 9.12        | -0.47             | 24.12                 | 32.68       | 1.43              |
|                               | Madagascar                 | 1997                 | 2003               | 20.69               | 20.94       | 0.04              | 3.89                  | 8.19        | 0.72              |
|                               | Malawi                     | 1992                 | 2015               | 10.27               | 7.17        | -0.14             | 9.54                  | 23.55       | 0.61              |
|                               | Mali                       | 1995                 | 2013               | 16.57               | 13.11       | -0.19             | 8.54                  | 20.50       | 0.66              |
|                               | Mozambique                 | 1997                 | 2011               | 11.03               | 9.07        | -0.14             | 11.41                 | 18.76       | 0.52              |
|                               | Namibia                    | 1992                 | 2013               | 16.67               | 17.19       | 0.02              | 24.05                 | 41.83       | 0.85              |
|                               | Niger                      | 1992                 | 2012               | 21.06               | 17.83       | -0.16             | 8.90                  | 19.28       | 0.52              |
|                               | Nigeria                    | 2003                 | 2013               | 17.32               | 12.27       | -0.51             | 25.69                 | 30.40       | 0.47              |
|                               | Rwanda                     | 2000                 | 2014               | 9.63                | 7.31        | -0.17             | 15.09                 | 23.62       | 0.61              |
|                               | Sao Tome and Principe      |                      | 2008               |                     | 8.26        |                   |                       | 39.86       |                   |
|                               | Senegal                    | 1992                 | 2010               | 18.05               | 29.99       | 0.66              | 19.91                 | 34.18       | 0.79              |
|                               | Sierra Leone               | 2008                 | 2013               | 12.98               | 10.73       | -0.45             | 33.23                 | 22.99       | -2.05             |
|                               | Swaziland                  |                      | 2006               |                     | 3.37        |                   |                       | 63.02       |                   |
|                               | Tanzania                   | 1991                 | 2015               | 10.99               | 10.22       | -0.03             | 11.73                 | 32.95       | 0.88              |
|                               | Togo                       | 1998                 | 2013               | 12.43               | 8.21        | -0.28             | 12.37                 | 35.26       | 1.53              |
|                               | Uganda                     | 1995                 | 2016               | 10.82               | 9.35        | -0.07             | 9.19                  | 27.41       | 0.87              |
|                               | Zambia                     | 1992                 | 2014               | 12.25               | 11.16       | -0.05             | 15.84                 | 26.55       | 0.49              |
|                               | Zimbabwe                   | 1994                 | 2015               | 5.43                | 6.07        | 0.03              | 25.39                 | 41.41       | 0.76              |

\* Nationally representative and regionally weighted

\*\* All data are from the Demographic and Health Surveys (DHS, <https://dhsprogram.com/>) with the exceptions of China (China Health and Nutrition Survey), Indonesia (Indonesian Family Life Survey), Mexico (Mexico's National Survey of Health and Nutrition), Brazil (Brazilian National Health Survey), and Vietnam (Vietnam Living Standards Survey).

**Supplemental Table S6. Prevalence\* of overweight and obesity for lowest and highest wealth quintiles, differences in the earliest and latest years, and annualized changes in disparity**

| Region                        | Country               | Earliest Year Quintiles |                    |                    |            | Most Recent Year Quintiles |                    |                    |            | Annualized Change<br>(Diff of Diff) |
|-------------------------------|-----------------------|-------------------------|--------------------|--------------------|------------|----------------------------|--------------------|--------------------|------------|-------------------------------------|
|                               |                       | Year                    | Poorest prevalence | Richest prevalence | Difference | Year                       | Poorest prevalence | Richest prevalence | Difference |                                     |
| East Asia and Pacific         | Cambodia              | 2000                    | 2.87               | 16.92              | -14.06     | 2014                       | 11.69              | 32.90              | -21.21     | -0.51                               |
|                               | China                 | 1991                    | 6.06               | 12.83              | -6.77      | 2015                       | 29.80              | 22.69              | 7.11       | 0.58                                |
|                               | Indonesia             | 1993                    | 12.23              | 23.35              | -11.12     | 2014                       | 39.88              | 40.79              | -0.92      | 0.49                                |
|                               | Myanmar               |                         |                    |                    |            | 2015                       | 15.41              | 42.09              | -26.68     |                                     |
|                               | Timor-Leste           |                         |                    |                    |            | 2009                       | 2.89               | 15.18              | -12.29     |                                     |
|                               | Vietnam               | 1992                    | 1.12               | 4.49               | -3.38      | 2002                       | 2.47               | 10.22              | -7.75      | -0.44                               |
| Europe and Central Asia       | Albania               |                         |                    |                    |            | 2008                       | 38.94              | 40.84              | -1.90      |                                     |
|                               | Armenia               | 2000                    | 43.31              | 50.22              | -6.91      | 2015                       | 48.88              | 46.71              | 2.17       | 0.61                                |
|                               | Azerbaijan            |                         |                    |                    |            | 2006                       | 42.51              | 60.48              | -17.98     |                                     |
|                               | Kazakhstan            | 1995                    | 36.70              | 41.66              | -4.96      | 1999                       | 38.08              | 34.40              | 3.68       | 2.16                                |
|                               | Kyrgyz Republic       | 1997                    | 27.59              | 36.44              | -8.85      | 2012                       | 48.52              | 40.61              | 7.91       | 1.12                                |
|                               | Moldova               |                         |                    |                    |            | 2005                       | 47.81              | 41.68              | 6.13       |                                     |
|                               | Tajikistan            |                         |                    |                    |            | 2012                       | 29.40              | 45.91              | -16.52     |                                     |
|                               | Turkey                | 1993                    | 41.95              | 48.96              | -7.01      | 2003                       | 52.56              | 50.24              | 2.32       | 0.93                                |
| Latin America & the Caribbean | Uzbekistan            | 1996                    | 20.37              | 31.11              | -10.75     |                            |                    |                    |            |                                     |
|                               | Bolivia               | 1994                    | 21.06              | 43.20              | -22.14     | 2008                       | 43.24              | 56.24              | -13.00     | 0.65                                |
|                               | Brazil                | 1996                    | 28.60              | 33.30              | -4.70      | 2013                       | 53.37              | 41.10              | 12.27      | 1.00                                |
|                               | Colombia              | 1995                    | 34.64              | 52.67              | -18.02     | 2010                       | 52.63              | 51.47              | 1.16       | 1.28                                |
|                               | Dominican Republic    | 1996                    | 34.27              | 53.67              | -19.40     | 2013                       | 51.04              | 57.65              | -6.62      | 0.75                                |
|                               | Guatemala             | 1995                    | 22.45              | 57.48              | -35.03     | 2014                       | 46.65              | 70.15              | -23.50     | 0.61                                |
|                               | Guyana                |                         |                    |                    |            | 2009                       | 51.01              | 57.86              | -6.85      |                                     |
|                               | Haiti                 | 1994                    | 4.22               | 31.32              | -27.11     | 2017                       | 20.04              | 60.57              | -40.53     | -0.58                               |
|                               | Honduras              | 2005                    | 32.81              | 65.70              | -32.89     | 2011                       | 43.48              | 67.10              | -23.63     | 1.54                                |
|                               | Mexico                | 1988                    | 29.25              | 34.59              | -5.33      | 2012                       | 67.44              | 65.55              | 1.89       | 0.30                                |
|                               | Nicaragua             | 1998                    | 34.79              | 61.83              | -27.04     | 2001                       | 37.47              | 66.58              | -29.10     | -0.69                               |
|                               | Peru                  | 1992                    | 28.67              | 49.58              | -20.91     | 2012                       | 47.76              | 61.47              | -13.72     | 0.36                                |
| Middle East and North Africa  | Egypt, Arab Rep.      | 1995                    | 30.59              | 73.55              | -42.96     | 2014                       | 78.36              | 81.95              | -3.59      | 2.07                                |
|                               | Jordan                | 1997                    | 57.77              | 62.38              | -4.61      | 2012                       | 64.65              | 51.32              | 13.33      | 1.20                                |
|                               | Morocco               | 1992                    | 16.19              | 51.47              | -35.28     | 2003                       | 31.77              | 57.45              | -25.68     | 0.87                                |
|                               | Yemen, Rep.           |                         |                    |                    |            | 2013                       | 8.55               | 56.12              | -47.57     |                                     |
| South Asia                    | Bangladesh            | 1996                    | 0.61               | 17.41              | -16.81     | 2014                       | 8.15               | 46.89              | -38.74     | -1.22                               |
|                               | India                 | 1998                    | 1.64               | 29.18              | -27.54     | 2015                       | 6.96               | 41.06              | -34.09     | -0.39                               |
|                               | Maldives              |                         |                    |                    |            | 2009                       | 38.04              | 54.91              | -16.87     |                                     |
|                               | Nepal                 | 1996                    | 1.03               | 9.25               | -8.22      | 2016                       | 12.07              | 52.82              | -40.75     | -1.63                               |
| Sub-Saharan Africa            | Burkina Faso          | 1992                    | 4.78               | 22.01              | -17.23     | 2010                       | 4.49               | 39.29              | -34.81     | -0.98                               |
|                               | Burundi               |                         |                    |                    |            | 2010                       | 3.97               | 24.84              | -20.87     |                                     |
|                               | Cameroon              | 1998                    | 8.76               | 39.41              | -30.65     | 2011                       | 12.14              | 61.43              | -49.29     | -1.43                               |
|                               | Central African Rep.  | 1994                    | 4.18               | 17.27              | -13.10     |                            |                    |                    |            |                                     |
|                               | Chad                  | 1996                    | 2.72               | 17.70              | -14.98     | 2014                       | 8.78               | 33.89              | -25.12     | -0.56                               |
|                               | Comoros               | 1996                    | 17.09              | 28.51              | -11.42     | 2012                       | 34.34              | 57.49              | -23.16     | -0.73                               |
|                               | Congo, Dem. Rep.      | 2007                    | 9.26               | 40.48              | -31.22     | 2013                       | 7.36               | 47.62              | -40.25     | -1.50                               |
|                               | Congo, Rep.           | 2005                    | 17.38              | 53.91              | -36.53     | 2011                       | 13.58              | 57.41              | -43.83     | -1.22                               |
|                               | Cote d'Ivoire         | 1994                    | 5.62               | 33.41              | -27.79     | 2011                       | 13.41              | 54.65              | -41.23     | -0.79                               |
|                               | Ethiopia              | 2000                    | 1.29               | 11.24              | -9.95      | 2016                       | 2.90               | 23.83              | -20.93     | -0.69                               |
|                               | Gabon                 | 2000                    | 16.49              | 46.51              | -30.02     | 2012                       | 35.54              | 60.56              | -25.01     | 0.42                                |
|                               | Gambia                |                         |                    |                    |            | 2013                       | 23.27              | 51.57              | -28.30     |                                     |
|                               | Ghana                 | 1993                    | 5.48               | 29.81              | -24.33     | 2014                       | 16.67              | 63.89              | -47.21     | -1.09                               |
|                               | Guinea                | 1999                    | 5.65               | 36.99              | -31.34     | 2012                       | 7.61               | 51.00              | -43.38     | -0.93                               |
|                               | Kenya                 | 1993                    | 9.61               | 29.53              | -19.92     | 2014                       | 13.57              | 58.91              | -45.34     | -1.21                               |
|                               | Lesotho               | 2004                    | 32.86              | 64.87              | -32.02     | 2014                       | 29.63              | 64.33              | -34.70     | -0.27                               |
|                               | Liberia               | 2007                    | 11.45              | 45.11              | -33.66     | 2013                       | 19.52              | 51.71              | -32.18     | 0.25                                |
|                               | Madagascar            | 1997                    | 2.66               | 12.28              | -9.62      | 2003                       | 3.24               | 17.23              | -13.99     | -0.73                               |
|                               | Malawi                | 1992                    | 4.11               | 18.86              | -14.74     | 2015                       | 13.35              | 42.70              | -29.35     | -0.64                               |
|                               | Mali                  | 1995                    | 4.02               | 25.52              | -21.51     | 2013                       | 13.18              | 42.76              | -29.57     | -0.45                               |
|                               | Mozambique            | 1997                    | 4.34               | 30.72              | -26.38     | 2011                       | 6.58               | 48.23              | -41.65     | -1.09                               |
|                               | Namibia               | 1992                    | 10.27              | 50.59              | -40.32     | 2013                       | 17.28              | 61.65              | -44.37     | -0.19                               |
|                               | Niger                 | 1998                    | 3.88               | 30.63              | -26.75     | 2012                       | 11.23              | 43.56              | -32.33     | -0.40                               |
|                               | Nigeria               | 2003                    | 12.98              | 45.18              | -32.20     | 2013                       | 12.50              | 50.27              | -37.77     | -0.56                               |
|                               | Rwanda                | 2000                    | 10.49              | 28.39              | -17.89     | 2014                       | 11.65              | 45.55              | -33.90     | -1.14                               |
|                               | Sao Tome and Principe |                         |                    |                    |            | 2008                       | 31.17              | 51.62              | -20.45     |                                     |
|                               | Senegal               | 2005                    | 15.48              | 61.11              | -45.62     | 2010                       | 17.19              | 45.32              | -28.12     | 3.50                                |
|                               | Sierra Leone          | 2008                    | 27.02              | 49.89              | -22.87     | 2013                       | 12.47              | 45.54              | -33.07     | -2.04                               |
|                               | Swaziland             |                         |                    |                    |            | 2006                       | 49.43              | 70.65              | -21.22     |                                     |
|                               | Tanzania              | 1996                    | 7.15               | 31.81              | -24.66     | 2015                       | 14.73              | 59.79              | -45.06     | -1.07                               |
|                               | Togo                  | 1998                    | 6.07               | 31.81              | -25.74     | 2013                       | 14.57              | 60.01              | -45.44     | -1.31                               |
|                               | Uganda                | 1995                    | 4.91               | 19.25              | -14.35     | 2016                       | 9.80               | 52.37              | -42.57     | -1.34                               |
| Zambia                        | 1996                  | 6.98                    | 23.83              | -16.85             | 2014       | 10.19                      | 49.19              | -39.00             | -1.23      |                                     |
| Zimbabwe                      | 1994                  | 15.24                   | 39.23              | -23.99             | 2015       | 23.38                      | 61.15              | -37.78             | -0.66      |                                     |

\* All data weighted to be nationally representative

Source: All data are from the Demographic and Health Surveys (DHS, <https://dhsprogram.com/>) with the exceptions of China (China Health and Nutrition Survey), Indonesia (Indonesian Family Life Survey), Mexico (Mexico's National Survey of Health and Nutrition), Brazil (Brazilian National Health Survey), and Vietnam (Vietnam Living Standards Survey).
